# Supplementary material for: Is enrolment in the national health insurance scheme in Ghana pro-poor? Evidence from the Ghana Living Standards Survey
Source: PubMed Central journal article supplement — BMJ Open. 2019 Jul 1;9(7):e029419. doi: 10.1136/bmjopen-2019-029419 (PMC6609063; doi:10.1136/bmjopen-2019-029419), 2019-07-01
Supplement: bmjopen-2019-029419.draft_revisions.pdf [file bmjopen-2019-029419.draft_revisions.pdf]

# BMJ Open

BMJ Open is committed to open peer review. As part of this commitment we make the peer review history of every article we publish publicly available.

When an article is published we post the peer reviewers' comments and the authors' responses online. We also post the versions of the paper that were used during peer review. These are the versions that the peer review comments apply to.

The versions of the paper that follow are the versions that were submitted during the peer review process. They are not the versions of record or the final published versions. They should not be cited or distributed as the published version of this manuscript.

BMJ Open is an open access journal and the full, final, typeset and author-corrected version of record of the manuscript is available on our site with no access controls, subscription charges or pay-per-view fees (<http://bmjopen.bmj.com>).

If you have any questions on BMJ Open's open peer review process please email [info.bmjopen@bmj.com](mailto:info.bmjopen@bmj.com)

# BMJ Open

## Is enrolment in the National Health Insurance Scheme in Ghana pro-poor? Evidence from the Ghana Living Standard Survey

|                               |                                                                                                                                                                                                                                                                                                    |
|-------------------------------|----------------------------------------------------------------------------------------------------------------------------------------------------------------------------------------------------------------------------------------------------------------------------------------------------|
| Journal:                      | <i>BMJ Open</i>                                                                                                                                                                                                                                                                                    |
| Manuscript ID                 | bmjopen-2019-029419                                                                                                                                                                                                                                                                                |
| Article Type:                 | Research                                                                                                                                                                                                                                                                                           |
| Date Submitted by the Author: | 26-Jan-2019                                                                                                                                                                                                                                                                                        |
| Complete List of Authors:     | Nsiah-Boateng, Eric ; University of Ghana School of Public Health, Prah Ruger, Jennifer; University of Pennsylvania, School of Social Policy & Practice and Perelman School of Medicine<br>Nonvignon, Justice; University of Ghana School of Public Health, Health Policy, Planning and Management |
| Keywords:                     | Health policy < HEALTH SERVICES ADMINISTRATION & MANAGEMENT, Health Insurance, Social protection                                                                                                                                                                                                   |
|                               |                                                                                                                                                                                                                                                                                                    |

SCHOLARONE™  
Manuscripts

## Is enrolment in the National Health Insurance Scheme in Ghana pro-poor? Evidence from the Ghana Living Standard Survey

Eric Nsiah-Boateng<sup>1,2</sup> Jennifer Prah Ruger<sup>3</sup> and Justice Nonvignon<sup>1</sup>

<sup>1</sup>School of Public Health, College of Health Sciences, University of Ghana, Accra, Ghana

<sup>2</sup>Research, Policy, Monitoring and Evaluation Directorate, National Health Insurance Authority, Accra, Ghana

<sup>3</sup>School of Social Policy & Practice and Perelman School of Medicine, University of Pennsylvania, Pennsylvania, USA

Corresponding author: Eric Nsiah-Boateng

[ensiah-boateng@st.ug.edu.gh](mailto:ensiah-boateng@st.ug.edu.gh)

### ABSTRACT

**Objectives** This article examines equity in enrolment in the Ghana National Health Insurance Scheme (NHIS) to inform policy decisions on progress towards realisation of universal health coverage (UHC).

**Design** Secondary analysis of data from the sixth round of the Ghana Living Standards Survey (GLSS 6).

**Setting** Household-based

**Participants:** A total of 16,774 household heads participated in the GLSS 6, which was conducted between 18 October 2012 and 17 October 2013.

**Analysis** Equity in enrolment was assessed using concentration curves and bivariate and multivariate analyses to determine associated factors.

**Main outcome measure** Equity in NHIS enrolment

**Results** Survey participants had a mean age of 46 years and mean household size of four persons. About 71% of households interviewed had at least one person enrolled in the NHIS. Households in the poorest wealth quintile (73%) had enrolled significantly ( $p<0.001$ ) more than those in the richest quintile (67%). The concentration curves further showed that enrolment was slightly disproportionately concentrated among poor households, particularly those headed by males. However, multivariate logistic analyses showed that the likelihood of NHIS enrolment increased from poorer to richest quintile and from low to high level of education. Other factors including age, sex, household size, household setting, and geographic region were significantly associated with enrolment.

**Conclusions** From 2012–2013 enrolment in the NHIS was higher among poor households, particularly male-headed households, although multivariate analyses demonstrated that the likelihood of NHIS enrolment increased from poorer to richest quintile and from low to high level of education. Policy makers need to ensure equity within and across gender as they strive to achieve UHC.

### Strengths and limitations of this study

- Our study is the first to use data from the Ghana Living Standards Survey (GLSS) to examine equity in enrolment in the National Health Insurance Scheme (NHIS).
- We applied concentration curves and multivariate logistic regression models to produce superior findings for informed decision-making.
- Unlike previous study, this study found that enrolment in the NHIS is slightly concentrated on the poor; however, the odds of enrolling increases with wealth quintile and level of education.
- As a secondary analysis, the data used for the study lack a number of important factors including trust in scheme management, perceived quality of care, ease of enrolment, etc., which are useful for better understanding NHIS enrolment.

## Introduction

Many low and middle income countries are increasingly implementing prepayment schemes to provide financial risk protection and equitable access to healthcare services for their populations, particularly the poor. (1–3) Prepayment schemes such as social health insurance, if implemented effectively, can reduce out-of-pocket payments (OOP) and associated catastrophic effects on households. (4) The quest to ensure equity in access to healthcare services and to achieve Universal Health Coverage (UHC) has become more imperative, following adoption of the Sustainable Development Goals (SDGs) by member countries of the UN. Equity in prepayment schemes is also recognised by WHO as one of the fundamental elements of UHC. (5)

Ghana had a free healthcare system after independence in the 1950s, financed by general taxation. However, this system of healthcare changed when the economy started declining and user fees were partially introduced in the 1970s and 1980s to offset costs of healthcare services delivery. (6–8) Although the OOP helped public healthcare services providers to recover partial costs of essential medicines and other pharmaceutical products and to raise revenue and improve efficiency, the system created inequity in access to healthcare and in some cases led to avoidable deaths. (6,8,9) This situation resulted in the introduction of a National Health Insurance Scheme (NHIS) in 2003 to replace OOP and ensure equity in healthcare access. (10) An unpublished annual report of the NHIS shows that the scheme covered 37% (10.66 million) of the population in 2017 and had 159 district offices and a network of over 4,000 healthcare providers across the country. The NHIS is managed by the National Health Insurance Authority (NHIA), a body mandated by law to regulate both public and private health insurance schemes in the country. (11)

Membership in the NHIS is broadly categorised into exempt and non-exempt groups. (11) The exempt groups are members who are exempted from paying premiums to the scheme and they include persons below 18 years old, pregnant women, indigent (extreme poor), formal sector workers who contribute to Social Security and National Insurance Trust (SSNIT), and beneficiaries of the Livelihood Empowerment Against Poverty (LEAP) programme. The non-exempt group includes members who pay premiums to the scheme and these are workers in the informal sector of the economy. The NHIS is tax-funded through the National Health Insurance Fund (NHIF) which is based on 2.5% levy on selected goods and services. Other sources of funding are a 2.5% deduction from formal sector workers' SSNIT contributions, premiums from informal sector workers, funds allocated by Parliament, interest from investments, and donor funds and gifts. (11) Evidence shows that the NHIS has made progress in population coverage and contributed to utilization of healthcare services and to expansion of healthcare facilities in its short period of existence. (12)

There are few equity-oriented studies of the NHIS in Ghana. A mixed-method study that evaluated equity in NHIS enrolment in two regions (Central and Eastern) found that more males registered than females and households in the richest quintile were significantly more likely to enrol than those in the poorest quintile. (1) The study also found that old age, higher education, female-headed households, and perceived NHIS benefits were significantly associated with NHIS enrolment. Another mixed-method study examining why the NHIS is not reaching the poor used the same two regions and found less of the poor to be covered due to poverty and policy makers' and implementers' lack of commitment to pursue NHIS's

1  
2  
3 equity goal. (13) Kusi et al, (14) in examining affordability of NHIS contribution, used three  
4 districts from the southern, middle and northern ecological zones of Ghana and also found  
5 that significantly more of the rich were enrolled in the NHIS than the poor. These three  
6 studies were conducted in 2008 and 2011 and employed bivariate and logistic regression  
7 analyses to examine enrolment equity. Other studies that also examined equity in NHIS  
8 enrolment, using data from the 2008 Ghana Demographic Health Survey (GDHS), employed  
9 concentration curves and logistic regression and focused on gender (19), finding that  
10 coverage was highest among the educated, households in the richest quintile, and urban  
11 residents. (15,16)  
12  
13  
14

15 This study employed data from the 2012–2013 Ghana Living Standards Survey (GLSS) round  
16 six, a nationally representative sample, and examined equity in enrolment by concentration  
17 curves and logistic regression analysis. It is necessary now to study equity to assess major  
18 NHIS policy reforms instituted in recent years to make the scheme more attractive to the  
19 general public. One such policy is the intersectoral collaboration with state-owned social  
20 protection institutions, for example, Ministry of Gender and Social Protection, Ministry of  
21 Education, LEAP Secretariat, and Savannah Accelerated Development Authority (SADA), to  
22 increase the population of the poor and vulnerable in the NHIS; to improve equity. Findings  
23 from this study can inform policy making on UHC attainment and contribute to the body of  
24 knowledge on equity in NHIS enrolment.  
25  
26  
27  
28

## 29 **Methods**

### 30 **Study design and setting**

31 This study analyses secondary data from the sixth round of the Ghana Living Standards Survey  
32 conducted between 18 October 2012 and 17 October 2013. The survey covered a  
33 representative sample of 18,000 households in 1,200 enumeration areas across the 10  
34 administrative regions of the country. (17) Survey participants had an average age of 43·8  
35 years and 48·0 years for male and females, respectively. In the 2010 Population and Housing  
36 Census (PHC), Ghana had a population of 24,658,823, with 51·2% being females. The majority  
37 of the population resided in the Ashanti (19·4%) and Greater Accra (16·3%) regions, the two  
38 most urbanised regions (18) of the country. These two regions also have the lowest poverty  
39 rates, whilst those in the northern savannah ecological zones (Northern, Upper East, Upper  
40 West, Brong-Ahafo, Volta) have the highest poverty rates. (19) Appendices 1 and 2 provide  
41 more details on the population distribution and poverty profile of Ghana.  
42  
43  
44  
45

### 46 **Data collection and analysis**

47 Data were sourced from the Ghana Statistical Service. Bivariate analyses examined  
48 unadjusted relationships between socio-demographic factors and wealth quintiles. Equity in  
49 enrolment was assessed using concentration curves and indices and multivariate logistic  
50 regression models to determine factors associated with enrolment. (1,15,20,21) The unit of  
51 analysis was the household and we examined cumulative proportion of enrolment by wealth  
52 quintiles, decomposed by sex, within and across male-headed and female-headed  
53 households. A multivariate logistic regression model (enrolled or not enrolled) was employed  
54 to assess whether lower wealth groups were more likely to enrol in the NHIS than higher  
55 wealth groups, holding the other socio-demographic variables constant. Socio-demographic  
56 variables included age, sex, household size, education, employment, wealth quintile,  
57  
58  
59  
60

household setting, and geographic region. Microsoft Excel 2016 and STATA version 13 were used for all analyses.

### **Patient and public involvement**

Patients were not involved in this study.

## **Results**

### **Characteristics of study participants**

A total of 16,772 household heads with an average age of 46 years and household size of 4 persons responded to questions on NHIS in the survey (Table 1). Out of the total, 72% were females; 51% had no formal education; 90% were employed; 24% were in the richest quintile; 56% lived in urban areas; and 12% were in the Ashanti region. About 71% of households had at least one person enrolled in the NHIS.

### **Equity in enrolment**

Results of the concentration curve analyses demonstrate that enrolment was slightly more concentrated among poor households (Figure 1). Enrolment by sex also showed that enrolment was more concentrated among households headed by males compared to those headed by females. The concentration indices further revealed that among study participants, equity was more pronounced in the insured than the uninsured and within male-headed households than female-headed households (Table 2).

### **Relationship between household characteristics and wealth quintiles**

There were significant differences in all household characteristics, except employment status, by wealth quintiles (Table 3). The poorest households (73%) enrolled in the NHIS more than the richest households (67%). Interestingly, the richer households had the second highest enrolment (72.4%) in the scheme. The majority of the poorest households (80.1%) had no formal education compared to about 25% of the richest households with tertiary level education. Similarly, the majority of the poorest households (91%) were more employed as were the richest households (89%), and there were more females (79%) in the poorest quintile than in the richest quintile (67%). There were also significantly more household heads aged 46 years or more in the poorest quintile (51%) than those in the richest quintile (35%), and more households in the poorest quintile (86%) living in urban settings than households in the richest quintiles (30%).

Results of the multivariate logistic regression showed that the likelihood of enrolling in the NHIS increases from poorer to richest quintile and from low to high level of education (Table 4). Females (OR: 1.44; 95% CI: 1.32–1.57); individuals aged 46 years or more (OR: 2.12; 95% CI: 1.86–2.19); and those living in the Upper East (OR: 5.84; 95% CI: 4.79–7.10), Upper West (OR: 5.00; 95% CI: 4.11–6.08), Brong-Ahafo (OR: 3.02; 95% CI: 2.56–3.57), Volta (OR: 2.04; 95% CI: 1.74–2.39), and Northern (OR: 1.42; 95% CI: 1.22–1.65) regions were significantly more likely to enrol in the NHIS than their respective reference categories. Surprisingly, the employed were less likely (OR=0.9; 95% CI 0.83–1.06) to enrol in the NHIS although not significantly so. The unadjusted odds ratios (OR) showed similar associations except for wealth quintile, the explanatory variable of interest, which showed a decreased likelihood of enrolling in the NHIS from poorer to richest.

## Discussion

This study examined equity in NHIS enrolment employing data from the Ghana Living Standards Survey (round six), which was conducted between October 2012 and October 2013. The findings show inequity in enrolment and significant associations between socio-demographic factors and NHIS enrolment. Among households surveyed, enrolment is disproportionately concentrated among poor households especially those headed by males. One possible explanation relates to policy changes made over the last few years to increase enrolment in the scheme. One such policy is the deliberate attempt to increase numbers of the poor and vulnerable in the scheme through enrolment of LEAP beneficiaries, students in secondary and tertiary institutions in Ghana, prisoners, and individuals living in less developed geographic regions, particularly those in the northern savannah ecological zone, where there is high prevalence of poverty. The disproportionate concentration of enrolment among poor households contradicts previous studies on the NHIS, (1,13–15,22,23) due possibly to the years in which those studies were conducted (2008 and 2011), as well as the limited regional scope (three administrative regions except the 2008 Demographic Health Survey that covered the entire country). This present study employs a nationally representative survey.

This study also shows that a number of socio-demographic factors are significantly associated with NHIS enrolment. Although unadjusted findings illustrate that enrolment is concentrated among poor households, multivariate findings illustrate that the odds of enrolling in the scheme increases with wealth quintiles, that is, the rich are more likely to enrol than the poor. This may be attributed to evidence that the rich are more able to afford the cost of enrolling in the health insurance programme than the poor. (1,13,24,25) Individuals with higher levels of education are more likely to enrol in the NHIS compared to those with no formal education; females are more likely to enrol than males; and adults are more likely to enrol than the young, consistent with previous studies. (1,15,23–26) The employed are less likely to enrol compared to the unemployed. A possible explanation is that the employed may be able to afford OOP for healthcare services because they are more economically resourced than the unemployed. This result runs counter to a number of studies. (14,26)

Findings from this study also reveal that individuals residing in rural settings are significantly less likely to enrol in the NHIS compared to those living in urban areas, consistent with previous studies, (23,26) but contradicting a study by Jehu-Appiah et al, (1) One reason may be due to poverty; (13,22,25,27–29) prior studies showed that the majority of rural dwellers are unable to afford the NHIS premium, which ranges from GHS7.20 (US\$1.51) to GHS48.00 (US\$10.13), and processing fee of GHS8.00 (US\$1.68) or renewal fee of GHS5.00 (US\$1.05). This study's findings also show that the odds of enrolling in the NHIS increases with household size, consistent with other studies, (15,24,25) because larger households may be risk averse and thus would enrol in the NHIS to seek financial risk protection against healthcare costs and to avoid catastrophic OOP. Our findings also reveal that individuals residing in less developed regions of the country are significantly more likely to enrol in the scheme compared to those in developed regions. Again, this may be attributed to policy reforms focused on enrolling individuals living in deprived regions, particularly those in the northern savannah ecological zones, comprising the Northern, Upper East, Upper West, and some parts of Brong-Ahafo and Volta regions, (17) consistent with some studies (15,16) and contradicting others. (26)



1  
2  
3 Our study's primary limitation is that the data lack a number of important factors (such as  
4 trust in scheme management, perceived quality of care, ease of enrolment, etc.), which would  
5 be useful for better understanding NHIS enrolment. Nonetheless, the variables used in the  
6 multivariate logistic regression modelling did not significantly affect model robustness.  
7  
8

### 9 **Conclusion**

10 The study reveals that from 2012–2013, enrolment in the NHIS was higher among poor  
11 households, particularly male-headed households, although multivariate analyses  
12 demonstrated that the likelihood of NHIS enrolment increased from poorer to richest quintile  
13 and from low to high level of education. Whilst the NHIS strives to achieve its pro-poor goal  
14 of providing financial risk protection for the poor and vulnerable in society, equity must be  
15 addressed within and across the entire population. Adequate funds are also required to cover  
16 the anticipated increase in medical claims costs because as more poor and vulnerable groups  
17 enrol in the scheme, the claims cost is likely to escalate and threaten the scheme's  
18 sustainability. Thus, policy decisions to ensure equity in enrolment must also ensure  
19 commensurate funding to avoid financial uncertainty and collapse. Further research on equity  
20 in healthcare services utilization, expenditures, and accreditation of healthcare providers is  
21 needed to provide a fuller picture of equity assessment in the NHIS.  
22  
23  
24  
25

### 26 **Ethics approval**

27 This study is a secondary analysis of the Ghana Living Standard Survey (round 6) data,  
28 however formal approval was obtained from the Ghana Statistical Service to use the data.  
29  
30

### 31 **Funding**

32 None  
33  
34

### 35 **Competing interests**

36 ENB is an employee of the National Health Insurance Authority, however his affiliation did  
37 not influence findings of this study. JPR and JN declare no competing interests.  
38  
39

### 40 **Contributors**

41 ENB, JPR and JN conceived and designed the study. JN retrieved the data and ENB analysed  
42 the data and drafted the manuscript. JPR and JN provided substantial intellectual  
43 contributions to develop and critically revise the manuscript. All the authors read and  
44 approved the manuscript for publication.  
45  
46

### 47 **Patient consent**

48 Not applicable  
49  
50

### 51 **Data sharing statement**

52 No additional data available  
53  
54

### 55 **Acknowledgements**

56 We are grateful to the Ghana Statistical Service for the provision of the GLSS data for this  
57 study. We also thank all contributors and reviewers for their comments and time.  
58  
59  
60

## Reference

1. Jehu-Appiah C, Aryeetey G, Spaan E, de Hoop T, Agyepong I, Baltussen R. Equity aspects of the National Health Insurance Scheme in Ghana: Who is enrolling, who is not and why? *Soc Sci Med*. 2011;72(2):157–65.
2. Wiseman V, Thabrany H, Asante A, Haemmerli M, Kosen S, Gilson L, et al. An evaluation of health systems equity in Indonesia: study protocol. *Int J Equity Health*. 2018;(17):1–9.
3. Asante A, Price J, Hayen A, Jan S, Wiseman V. Equity in Health Care Financing in Low- and Middle-Income Countries : A Systematic Review of Evidence from Studies Using Benefit and Financing Incidence Analyses. *PLoS One*. 2016;11(4):1–20.
4. Ruger JP. An Alternative Framework for Analyzing Financial Protection in Health. *PLoS Med*. 2012;9:e1001294.
5. WHO. Health systems financing: the path to universal coverage. *World Heal Rep*. 2010;1–128.
6. Waddington C, Enyimayew KA. A price to pay, part 2: The impact of user charges in the Volta region of Ghana. *Int J Health Plann Manage*. 1990;5(4):287–312.
7. Asenso-Okyere WK, Anum A, Osei-Akoto I, Adukonu A. Cost recovery in Ghana: are there any changes in health care seeking behaviour? *Health Policy Plan*. 1998;13(2):181–8.
8. Nyonator F, Kutzin J. Health for some? The effects of user fees in the Volta Region of Ghana. *Health Policy Plan*. 1999;14(4):329–41.
9. Ministry of Health. National Health Insurance Policy framework for Ghana: Revised Version. Accra; 2004. [https://www.ghanahealthservice.org/downloads/NHI\\_policy\\_framework.pdf](https://www.ghanahealthservice.org/downloads/NHI_policy_framework.pdf). Accessed: 17 Dec 2017.
10. Parliament of Ghana. National Health Insurance Act, 2003 (Act 650). Insurance Act, 650 Accra, Ghana; 2003 p. 1–39.
11. Parliament of Ghana. National Health Insurance Act, 2012 (Act 852). Accra, Ghana: Parliament of Ghana; 2012 p. 1–55.
12. National Development Planning Commission. 2008 Citizens' assessment of the national health insurance scheme: towards a sustainable health care financing arrangement that protects the poor. Accra; 2009.
13. Kotoh AM, Van Der Geest S. Why are the poor less covered in Ghana's national health insurance? A critical analysis of policy and practice. *Int J Equity Health*. 2016;15(34):1–11.
14. Kusi A, Enemark U, Hansen KS, Asante FA. Refusal to enrol in Ghana ' s National Health Insurance Scheme : is affordability the problem ? *Int J Equity Health*. 2015;14(2):1–14.
15. Dake FAA. Examining equity in health insurance coverage : an analysis of Ghana ' s National Health Insurance Scheme. *Int J Equity Health*. 2018;17(85):1–10.
16. Dixon J, Tenkorang EY, Luginaah I. Ghana's National Health Insurance Scheme: Helping the Poor or Leaving Them Behind? *Environ Plan C Gov Policy*. 2011;29(6):1102–15.
17. Ghana Statistical Service. Ghana Living Standards Survey Round 6 (GLSS 6): Main Report. Accra; 2014. [http://www.statsghana.gov.gh/docfiles/glss6/GLSS6\\_Main\\_Report.pdf](http://www.statsghana.gov.gh/docfiles/glss6/GLSS6_Main_Report.pdf). Accessed: 21 August 2017.
18. Ghana Statistical Service. 2010 Population & housing census: summary report of final results. Accra; 2012.

- 1  
2  
3  
4 [http://statsghana.gov.gh/docfiles/2010phc/Census2010\\_Summary\\_report\\_of\\_final\\_results.pdf](http://statsghana.gov.gh/docfiles/2010phc/Census2010_Summary_report_of_final_results.pdf). Accessed: 21 August 2017.
- 5  
6 19. Ghana Statistical Service. Ghana Living Standards Survey Round 6 (GLSS 6): Poverty Profile in Ghana (2005-2013). Accra; 2014.
- 7  
8 [http://www.statsghana.gov.gh/docfiles/glss6/GLSS6\\_Poverty Profile in Ghana.pdf](http://www.statsghana.gov.gh/docfiles/glss6/GLSS6_Poverty_Profile_in_Ghana.pdf). Accessed: 29 Jan 2017.
- 9  
10  
11 20. Allin S, Masseria C, Sorenson C, Papanicolas I, Mossialos E. Measuring inequalities in access to health care. A review of the indices. *London Sch Econ Polit Sci*. 2007;(June):1–24.
- 12  
13  
14 21. O'Donnell O, Van Doorslaer DE, Wagstaff A, Lindelow M. *Analyzing Health Equity Using Household Survey Data: A Guide to Techniques and Their Implementation*. Washington DC: The World Bank; 2008. [www.worldbank.org](http://www.worldbank.org). Accessed: 22 Sep 2018.
- 15  
16  
17 22. Kotoh AM, Aryeetey GC, Van Der Geest S. Factors That Influence Enrolment and Retention in Ghana's National Health Insurance Scheme. *Int J Heal Policy Manag Int J Heal Policy Manag*. 2018;7(5):443–54.
- 18  
19  
20 23. Akazili J, Welaga P, Bawah A, Achana FS, Oduro A, Awoonor-Williams JK, et al. Is Ghana's pro-poor health insurance scheme really for the poor? Evidence from Northern Ghana. *BMC Health Serv Res*. 2014;14(637):1–9.
- 21  
22  
23 24. Dror DM, Hossain SAS, Majumdar A, Pérez Koehlmoos TL, John D, Panda PK. What Factors Affect Voluntary Uptake of Community-Based Health Insurance Schemes in Low- and Middle-Income Countries? A Systematic Review and Meta-Analysis. *PLoS One*. 2016;11(8):1–31.
- 24  
25  
26 25. Adebayo EF, Uthman OA, Wiysonge CS, Stern EA, Lamont KT, Ataguba JE. A systematic review of factors that affect uptake of community-based health insurance in low-income and middle-income countries. *BMC Health Serv Res*. 2015;15(543):1–13.
- 27  
28  
29 26. van der Wielen N, Falkingham J, Channon AA. Determinants of National Health Insurance enrolment in Ghana across the life course: Are the results consistent between surveys? *Int J Equity Health*. 2018;17(49):1–14.
- 30  
31  
32 27. Fenny AP, Kusi A, Arhinful DK, Asante FA. Factors contributing to low uptake and renewal of health insurance: a qualitative study in Ghana. *Glob Heal Res Policy*. 2016;1(18):1–10.
- 33  
34  
35 28. Agyepong IA, Nana D, Abankwah Y, Abroso A, Chun C, Nii J, et al. The "Universal" in UHC and Ghana's National Health Insurance Scheme: policy and implementation challenges and dilemmas of a lower middle income country. *BMC Health Serv Res*. 2016;16(504):1–14.
- 36  
37  
38 29. Atinga RA, Abiiro GA, Kuganab-Lem RB. Factors influencing the decision to drop out of health insurance enrolment among urban slum dwellers in Ghana. *Trop Med Int Heal*. 2015;20(3):312–21.
- 39  
40  
41  
42  
43  
44  
45  
46  
47  
48  
49  
50  
51  
52  
53  
54  
55  
56  
57  
58  
59  
60

**Table 1:** Individual and household characteristics

| <b>Variable</b>                         | <b>% (n=16,772)</b> |
|-----------------------------------------|---------------------|
| <b>NHIS status</b>                      |                     |
| Covered                                 | 70.5                |
| Not covered                             | 29.5                |
| <b>Highest Education</b>                |                     |
| None                                    | 50.7                |
| Primary                                 | 30.5                |
| Secondary                               | 8.5                 |
| Tertiary                                | 10.3                |
| <b>Employment status</b>                |                     |
| Employed                                | 89.5                |
| Unemployed                              | 10.5                |
| <b>Wealth quintile</b>                  |                     |
| Poorest                                 | 20.1                |
| Poorer                                  | 17.6                |
| Middle                                  | 17.9                |
| Richer                                  | 20.1                |
| Richest                                 | 24.3                |
| <b>Sex</b>                              |                     |
| Female                                  | 71.8                |
| Male                                    | 28.2                |
| <b>Age (M=45.84; SD=15.89)</b>          |                     |
| <46                                     | 57.1                |
| 46+                                     | 42.9                |
| <b>Household size (M=4.26; SD=2.78)</b> |                     |
| <4                                      | 58.8                |
| 4+                                      | 41.2                |
| <b>Household setting</b>                |                     |
| Rural                                   | 44.4                |
| Urban                                   | 55.6                |
| <b>Geographic region</b>                |                     |
| Western                                 | 10.2                |
| Central                                 | 9.6                 |
| Greater Accra                           | 11.5                |
| Volta                                   | 9.4                 |
| Eastern                                 | 10.8                |
| Ashanti                                 | 11.8                |
| Brong Ahafo                             | 9.7                 |
| Northern                                | 10.2                |
| Upper East                              | 8.6                 |
| Upper West                              | 8.3                 |

M: mean; SD: standard deviation

**Table 2:** Concentration index (CI) showing inequity in NHIS enrolment

| Wealth quintile | Total          |               | Within households (HH) |               |                |               | Between households (HH) |                |
|-----------------|----------------|---------------|------------------------|---------------|----------------|---------------|-------------------------|----------------|
|                 | Enrolled       | Not enrolled  | Female-headed HH       |               | Male-headed HH |               | Female                  | Male           |
|                 |                |               | Enrolled               | Not enrolled  | Enrolled       | Not enrolled  |                         |                |
| Poorest         | -0.0009        | 0.0021        | -0.0023                | 0.0060        | -0.0009        | 0.0020        | 0.0073                  | -0.0029        |
| Poorer          | -0.0014        | 0.0035        | 0.0061                 | -0.0153       | -0.0010        | 0.0026        | 0.0096                  | -0.0039        |
| Middle          | 0.0018         | -0.0039       | -0.0085                | 0.0234        | -0.0002        | 0.0011        | 0.0268                  | -0.0108        |
| Richer          | -0.0116        | 0.0290        | 0.0000                 | 0.0000        | -0.0135        | 0.0321        | 0.0455                  | -0.0185        |
| Richest         | 0.0000         | 0.0000        | -0.0056                | 0.0167        | 0.0000         | 0.0000        | 0.0000                  | 0.0000         |
| <b>Total</b>    | <b>-0.0120</b> | <b>0.0307</b> | <b>-0.0103</b>         | <b>0.0307</b> | <b>-0.0156</b> | <b>0.0378</b> | <b>0.0891</b>           | <b>-0.0362</b> |

**Table 3:** Differences in household characteristics by wealth quintile (n=16,772)

| Variable                 | Q1<br>(Poorest) | Q2<br>(Poorer) | Q3<br>(Middle) | Q4<br>(Richer) | Q5<br>(Richest) | Total | Pearson's<br>$\chi^2$ |
|--------------------------|-----------------|----------------|----------------|----------------|-----------------|-------|-----------------------|
| <b>NHIS status</b>       |                 |                |                |                |                 |       | 0.000                 |
| Enrolled                 | 72.6            | 70.9           | 70.3           | 72.4           | 67.0            | 70.5  |                       |
| Not enrolled             | 27.4            | 29.1           | 29.7           | 27.6           | 33.0            | 29.5  |                       |
| <b>Highest education</b> |                 |                |                |                |                 |       | 0.000                 |
| None                     | 80.1            | 62.7           | 51.9           | 39.8           | 25.8            | 50.7  |                       |
| Primary                  | 16.3            | 28.7           | 34.8           | 38.7           | 33.6            | 30.5  |                       |
| Secondary                | 2.1             | 5.4            | 7.0            | 10.1           | 15.8            | 8.5   |                       |
| Tertiary                 | 1.5             | 3.2            | 6.3            | 11.4           | 24.8            | 10.3  |                       |
| <b>Employment status</b> |                 |                |                |                |                 |       | 0.065                 |
| Employed                 | 90.9            | 89.6           | 90.5           | 88.7           | 88.8            | 89.5  |                       |
| Unemployed               | 9.1             | 10.4           | 9.5            | 11.3           | 11.2            | 10.5  |                       |
| <b>Sex</b>               |                 |                |                |                |                 |       | 0.000                 |
| Female                   | 79.1            | 73.1           | 71.7           | 69.4           | 66.9            | 71.8  |                       |
| Male                     | 20.9            | 26.9           | 28.3           | 30.6           | 33.1            | 28.2  |                       |
| <b>Age (years)</b>       |                 |                |                |                |                 |       | 0.000                 |
| <46                      | 49.2            | 53.8           | 56.3           | 58.9           | 65.0            | 57.1  |                       |
| 46+                      | 50.8            | 46.2           | 43.7           | 41.1           | 35.0            | 42.9  |                       |
| <b>Household size</b>    |                 |                |                |                |                 |       | 0.000                 |
| <4                       | 30.3            | 46.2           | 57.2           | 69.2           | 84.0            | 58.8  |                       |
| 4+                       | 69.7            | 53.8           | 42.8           | 30.8           | 16.0            | 41.2  |                       |
| <b>Household setting</b> |                 |                |                |                |                 |       | 0.000                 |
| Rural                    | 13.7            | 31.1           | 43.6           | 56.0           | 70.4            | 44.4  |                       |
| Urban                    | 86.3            | 68.9           | 56.4           | 44.0           | 29.6            | 55.6  |                       |
| <b>Geographic region</b> |                 |                |                |                |                 |       | 0.000                 |
| Western                  | 5.6             | 9.4            | 11.1           | 12.8           | 11.9            | 10.2  |                       |
| Central                  | 5.1             | 10.6           | 12.2           | 10.8           | 9.5             | 9.6   |                       |
| Greater Accra            | 2.3             | 4.4            | 8.0            | 14.0           | 24.7            | 11.5  |                       |
| Volta                    | 8.7             | 11.0           | 9.8            | 10.1           | 7.9             | 9.4   |                       |
| Eastern                  | 7.0             | 11.8           | 13.8           | 13.1           | 8.9             | 10.8  |                       |
| Ashanti                  | 4.0             | 9.2            | 11.9           | 14.6           | 17.7            | 11.8  |                       |
| Brong-Ahafo              | 8.4             | 11.9           | 11.0           | 9.6            | 8.2             | 9.7   |                       |
| Northern                 | 20.0            | 12.9           | 9.6            | 6.4            | 3.6             | 10.2  |                       |
| Upper East               | 14.7            | 11.4           | 8.3            | 6.2            | 3.8             | 8.6   |                       |
| Upper West               | 24.2            | 7.4            | 4.2            | 2.5            | 3.8             | 8.3   |                       |

**Table 4:** Multivariate logistic regression model for enrolling in NHIS

| Variable                 | Unadjusted OR | [95% C.I] | Adjusted OR | [95% C.I] |
|--------------------------|---------------|-----------|-------------|-----------|
| <b>Wealth quintile</b>   |               |           |             |           |
| Poorest                  | 1.00          |           | 1.00        |           |
| Poorer                   | 0.92          | 0.82–1.02 | 1.21**      | 1.07–1.37 |
| Middle                   | 0.89*         | 0.79–0.99 | 1.33***     | 1.18–1.51 |
| Richer                   | 0.98          | 0.88–1.09 | 1.60***     | 1.41–1.82 |
| Richest                  | 0.76***       | 0.69–0.84 | 1.26**      | 1.09–1.43 |
| <b>Highest education</b> |               |           |             |           |
| None                     | 1.00          |           | 1.00        |           |
| Primary                  | 1.05          | 0.98–1.14 | 1.55***     | 1.42–1.69 |
| Secondary                | 1.27***       | 1.12–1.44 | 2.16***     | 1.88–2.49 |
| Tertiary                 | 1.75***       | 1.55–1.99 | 2.73***     | 2.36–3.16 |
| <b>Employment status</b> |               |           |             |           |
| Unemployed               | 1.00          |           | 1.00        |           |
| Employed                 | 0.85**        | 0.76–0.95 | 0.94        | 0.83–1.06 |
| <b>Sex</b>               |               |           |             |           |
| Male                     | 1.00          |           | 1.00        |           |
| Female                   | 1.11**        | 1.03–1.19 | 1.44***     | 1.32–1.57 |
| <b>Age (years)</b>       |               |           |             |           |
| <46                      | 1.00          |           | 1.00        |           |
| 46+                      | 1.47***       | 1.37–1.57 | 1.49***     | 1.38–1.60 |
| <b>Household size</b>    |               |           |             |           |
| <4                       | 1.00          |           | 1.00        |           |
| 4+                       | 1.81***       | 1.69–1.94 | 2.02***     | 1.86–2.19 |
| <b>Household setting</b> |               |           |             |           |
| Urban                    | 1.00          |           | 1.00        |           |
| Rural                    | 0.96          | 0.90–1.03 | 0.77***     | 0.79–0.83 |
| <b>Geographic region</b> |               |           |             |           |
| Western                  | 1.00          |           | 1.00        |           |
| Central                  | 0.64***       | 0.55–0.73 | 0.63***     | 0.55–0.73 |
| Greater Accra            | 0.79**        | 0.69–0.90 | 0.63***     | 0.54–0.73 |
| Volta                    | 1.89***       | 1.62–2.21 | 2.04***     | 1.74–2.39 |
| Eastern                  | 1.33***       | 1.16–1.53 | 1.36***     | 1.17–1.56 |
| Ashanti                  | 1.15*         | 1.01–1.32 | 1.08        | 0.94–1.25 |
| Brong-Ahafo              | 2.68***       | 2.27–3.15 | 3.02***     | 2.56–3.57 |
| Northern                 | 1.06          | 0.92–1.22 | 1.42***     | 1.22–1.65 |
| Upper East               | 4.30***       | 3.56–5.19 | 5.84***     | 4.79–7.10 |
| Upper West               | 3.61***       | 3.01–4.33 | 5.00**      | 4.11–6.08 |
| <b>_cons</b>             |               |           | 0.49**      | 0.39–0.63 |

OR: odds ratio; \* $p < 0.10$ ; \*\* $p < 0.05$ ; \*\*\* $p < 0.01$ ; \*\*\*\* $p < 0.001$ ; Control variables: education of household head, employment status of household head, sex of household, age of household head, household size, household setting and geographic region

#### Figure legends

Figure 1: Concentration curves for enrolment in NHIS

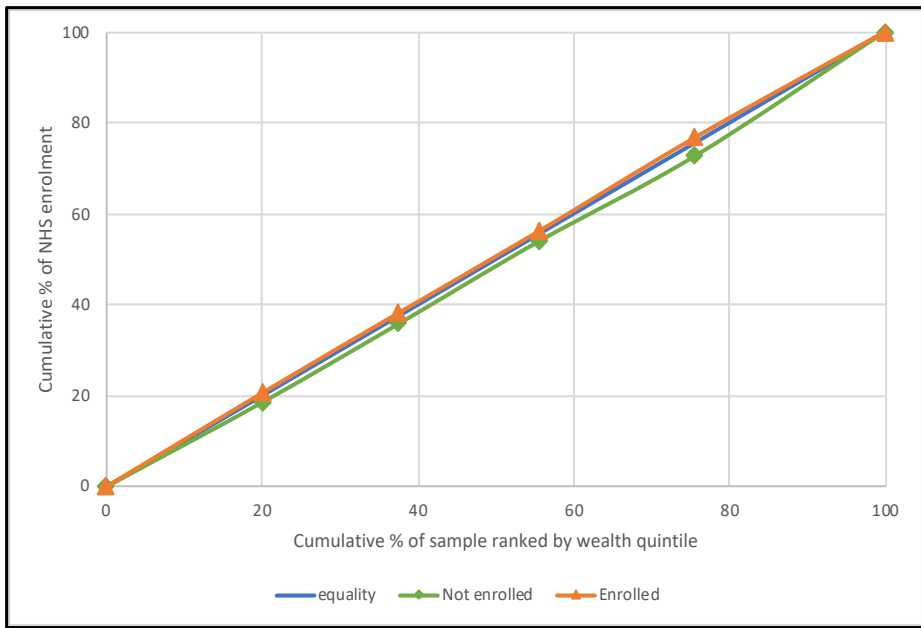

a: Concentration curves for NHIS enrolment

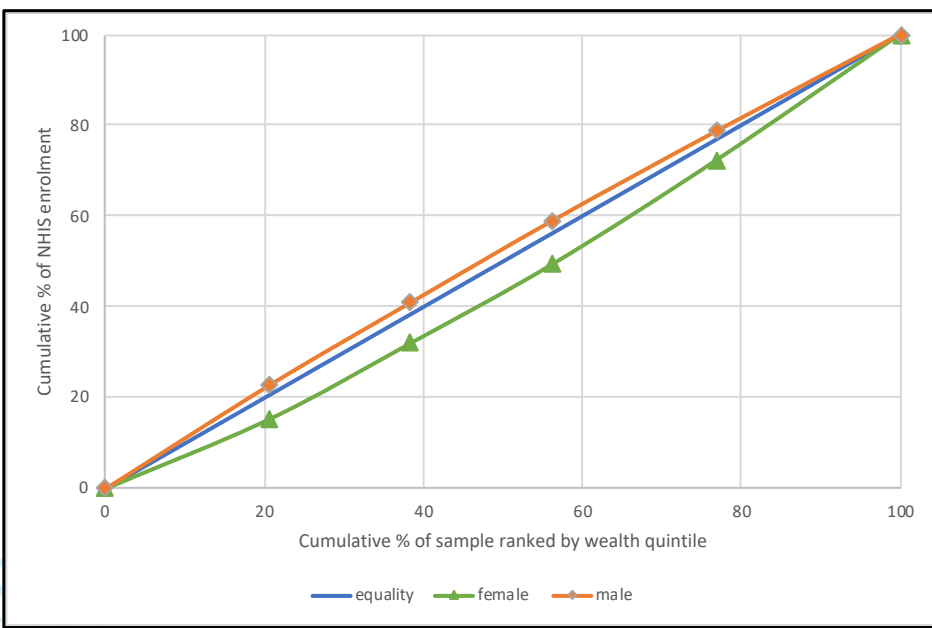

b: Concentration curves for NHIS enrolment by sex

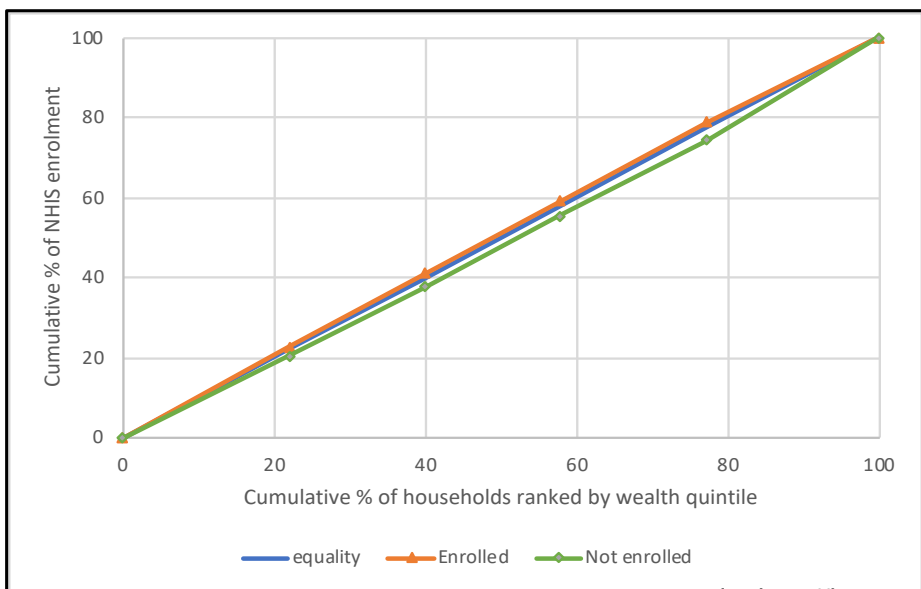

c: Concentration curves for NHIS enrolment in male-headed households

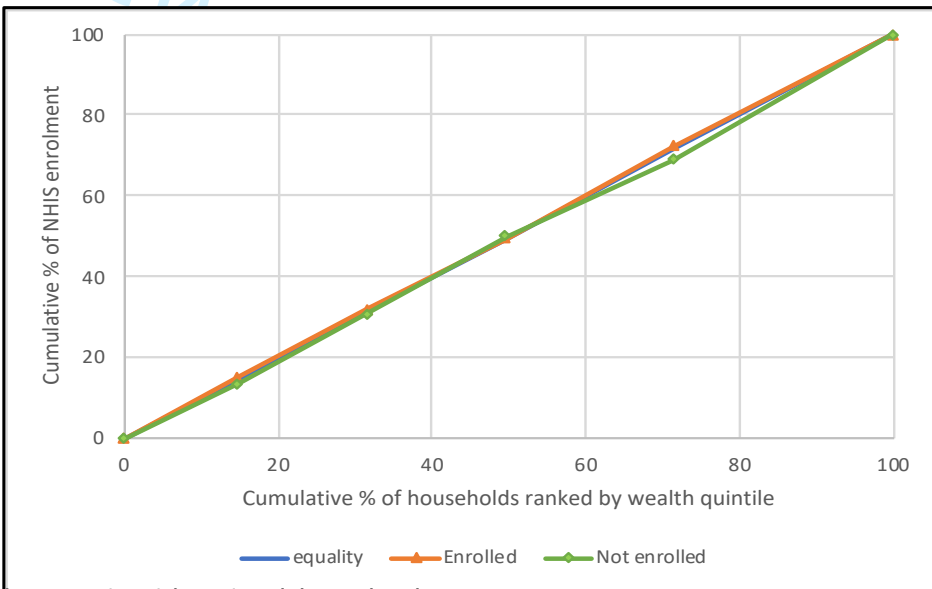

d: Concentration curves for NHIS enrolment in female-headed households

Figure 1: Concentration curves for enrolment in NHIS

For peer review only - <http://bmjopen.bmj.com/site/about/guidelines.xhtml>

**Appendix 1:** Distribution of population by region, sex and locality of enumeration, 2010

| Region             | Total Population  | Male              | Female            | Locality of enumeration |                   | Share of Population (%) | Proportion urban | Sex Ratio   | Percentage increase over 2000 | Intercensal Growth Rate (%) |
|--------------------|-------------------|-------------------|-------------------|-------------------------|-------------------|-------------------------|------------------|-------------|-------------------------------|-----------------------------|
|                    |                   |                   |                   | Urban                   | Rural             |                         |                  |             |                               |                             |
| <b>All Regions</b> | <b>24,658,823</b> | <b>12,024,845</b> | <b>12,633,978</b> | <b>12,545,229</b>       | <b>12,113,594</b> | <b>100.0</b>            | <b>50.9</b>      | <b>95.2</b> | <b>30.4</b>                   | <b>2.5</b>                  |
| Western            | 2,376,021         | 1,187,774         | 1,188,247         | 1,007,969               | 1,368,052         | 9.6                     | 42.4             | 100.0       | 23.5                          | 2.0                         |
| Central            | 2,201,863         | 1,050,112         | 1,151,751         | 1,037,878               | 1,163,985         | 8.9                     | 47.1             | 91.2        | 38.1                          | 3.1                         |
| Greater Accra      | 4,010,054         | 1,938,225         | 2,071,829         | 3,630,955               | 379,099           | 16.3                    | 90.5             | 93.6        | 38.0                          | 3.1                         |
| Volta              | 2,118,252         | 1,019,398         | 1,098,854         | 713,735                 | 1,404,517         | 8.6                     | 33.7             | 92.8        | 29.5                          | 2.5                         |
| Eastern            | 2,633,154         | 1,290,539         | 1,342,615         | 1,143,918               | 1,489,236         | 10.7                    | 43.4             | 96.1        | 25.0                          | 2.1                         |
| Ashanti            | 4,780,380         | 2,316,052         | 2,464,328         | 2,897,290               | 1,883,090         | 19.4                    | 60.6             | 94.0        | 32.3                          | 2.7                         |
| Brong Ahafo        | 2,310,983         | 1,145,271         | 1,165,712         | 1,028,473               | 1,282,510         | 9.4                     | 44.5             | 98.2        | 27.3                          | 2.3                         |
| Northern           | 2,479,461         | 1,229,887         | 1,249,574         | 750,712                 | 1,728,749         | 10.1                    | 30.3             | 98.4        | 36.2                          | 2.9                         |
| Upper East         | 1,046,545         | 506,405           | 540,140           | 219,646                 | 826,899           | 4.2                     | 21.0             | 93.8        | 13.7                          | 1.2                         |
| Upper West         | 702,110           | 341,182           | 360,928           | 114,653                 | 587,457           | 2.8                     | 16.3             | 94.5        | 21.8                          | 1.9                         |

**Source:** Adapted from Ghana Statistical Service <sup>18</sup>



**Appendix 2:** Poverty incidence and poverty gap by region (%) 2005/06–2012/13 (Poverty line=GHS1,314=US\$277.22)

| Region           | Poverty incidence (P <sub>0</sub> ) | Contribution to total poverty (C <sub>0</sub> ) | Poverty gap (P <sub>1</sub> ) | Contribution to total poverty gap (C <sub>1</sub> ) | Poverty incidence (P <sub>0</sub> ) | Contribution to total poverty (C <sub>0</sub> ) | Poverty gap (P <sub>1</sub> ) | Contribution to total poverty gap |
|------------------|-------------------------------------|-------------------------------------------------|-------------------------------|-----------------------------------------------------|-------------------------------------|-------------------------------------------------|-------------------------------|-----------------------------------|
| <b>2012/13</b>   |                                     |                                                 |                               |                                                     | <b>2005/06</b>                      |                                                 |                               |                                   |
| Western          | 20.9                                | 7.9                                             | 5.7                           | 6.8                                                 | 22.9                                | 7.3                                             | 5.4                           | 5.0                               |
| Central          | 18.8                                | 6.9                                             | 5.6                           | 6.4                                                 | 23.4                                | 6.4                                             | 5.6                           | 4.4                               |
| Greater Accra    | 5.6                                 | 3.8                                             | 1.6                           | 3.5                                                 | 13.5                                | 5.9                                             | 3.7                           | 4.7                               |
| Volta            | 33.8                                | 12.1                                            | 9.8                           | 11.0                                                | 37.3                                | 8.7                                             | 9.2                           | 6.2                               |
| Eastern          | 21.7                                | 9.3                                             | 5.8                           | 7.8                                                 | 17.8                                | 7.5                                             | 4.2                           | 5.2                               |
| Ashanti          | 14.8                                | 12.0                                            | 3.5                           | 9.0                                                 | 24.0                                | 12.6                                            | 6.4                           | 9.8                               |
| Brong Ahafo      | 27.9                                | 11.4                                            | 7.4                           | 9.4                                                 | 34.0                                | 9.8                                             | 9.5                           | 7.9                               |
| Northern         | 50.4                                | 20.8                                            | 19.3                          | 24.9                                                | 55.7                                | 21.0                                            | 23.0                          | 25.2                              |
| Upper East       | 44.4                                | 7.4                                             | 17.2                          | 9.0                                                 | 72.9                                | 10.9                                            | 35.3                          | 15.3                              |
| Upper West       | 70.7                                | 8.4                                             | 33.2                          | 12.3                                                | 89.1                                | 10.0                                            | 50.7                          | 16.4                              |
| <b>All Ghana</b> | <b>24.2</b>                         | <b>100.0</b>                                    | <b>7.8</b>                    | <b>100.0</b>                                        | <b>31.9</b>                         | <b>100.0</b>                                    | <b>11.0</b>                   | <b>100.0</b>                      |

Source: Adapted from Ghana Statistical Service <sup>19</sup>

# BMJ Open

## Is enrolment in the National Health Insurance Scheme in Ghana pro-poor? Evidence from the Ghana Living Standard Survey

|                                 |                                                                                                                                                                                                                                                                                                    |
|---------------------------------|----------------------------------------------------------------------------------------------------------------------------------------------------------------------------------------------------------------------------------------------------------------------------------------------------|
| Journal:                        | <i>BMJ Open</i>                                                                                                                                                                                                                                                                                    |
| Manuscript ID                   | bmjopen-2019-029419.R1                                                                                                                                                                                                                                                                             |
| Article Type:                   | Research                                                                                                                                                                                                                                                                                           |
| Date Submitted by the Author:   | 22-Apr-2019                                                                                                                                                                                                                                                                                        |
| Complete List of Authors:       | Nsiah-Boateng, Eric ; University of Ghana School of Public Health, Prah Ruger, Jennifer; University of Pennsylvania, School of Social Policy & Practice and Perelman School of Medicine<br>Nonvignon, Justice; University of Ghana School of Public Health, Health Policy, Planning and Management |
| <b>Primary Subject Heading</b>: | Health policy                                                                                                                                                                                                                                                                                      |
| Secondary Subject Heading:      | Public health                                                                                                                                                                                                                                                                                      |
| Keywords:                       | Enrolment, Equity, National Health Insurance Scheme, Ghana                                                                                                                                                                                                                                         |
|                                 |                                                                                                                                                                                                                                                                                                    |

SCHOLARONE™  
Manuscripts

## Is enrolment in the National Health Insurance Scheme in Ghana pro-poor? Evidence from the Ghana Living Standard Survey

Eric Nsiah-Boateng<sup>1,2</sup> Jennifer Prah Ruger<sup>3</sup> and Justice Nonvignon<sup>1,4</sup>

<sup>1</sup>School of Public Health, College of Health Sciences, University of Ghana, Accra, Ghana

<sup>2</sup>Research, Policy, Monitoring and Evaluation Directorate, National Health Insurance Authority, Accra, Ghana

<sup>3</sup>School of Social Policy & Practice and Perelman School of Medicine, University of Pennsylvania, Pennsylvania, USA

<sup>4</sup>Health Economics, Systems and Policy Research Group, University of Ghana, Legon

Corresponding author: Eric Nsiah-Boateng

[ensiah-boateng@st.ug.edu.gh](mailto:ensiah-boateng@st.ug.edu.gh)

### ABSTRACT

**Objectives** This article examines equity in enrolment in the Ghana National Health Insurance Scheme (NHIS) to inform policy decisions on progress towards realisation of universal health coverage (UHC).

**Design** Secondary analysis of data from the sixth round of the Ghana Living Standards Survey (GLSS 6).

**Setting** Household-based

**Participants:** A total of 16,774 household heads participated in the GLSS 6, which was conducted between 18 October 2012 and 17 October 2013.

**Analysis** Equity in enrolment was assessed using concentration curves and bivariate and multivariate analyses to determine associated factors.

**Main outcome measure** Equity in NHIS enrolment

**Results** Survey participants had a mean age of 46 years and mean household size of four persons. About 71% of households interviewed had at least one person enrolled in the NHIS. Households in the poorest wealth quintile (73%) had enrolled significantly ( $p<0.001$ ) more than those in the richest quintile (67%). The concentration curves further showed that enrolment was slightly disproportionately concentrated among poor households, particularly those headed by males. However, multivariate logistic analyses showed that the likelihood of NHIS enrolment increased from poorer to richest quintile, low to high level of education, and young adults to older adults. Other factors including sex, household size, household setting, and geographic region were significantly associated with enrolment.

**Conclusions** From 2012–2013 enrolment in the NHIS was higher among poor households, particularly male-headed households, although multivariate analyses demonstrated that the likelihood of NHIS enrolment increased from poorer to richest quintile and from low to high level of education. Policy makers need to ensure equity within and across gender as they strive to achieve UHC.

**Strengths and limitations of this study**

- Our study is the first to use data from the Ghana Living Standards Survey (GLSS) to examine equity in enrolment in the National Health Insurance Scheme (NHIS).
- We developed concentration curves and multivariate logistic regression models to produce new findings to inform decision-making.
- Unlike previous studies, this study found that enrolment in the NHIS is slightly concentrated among the poor; however, the odds of enrolling increases with wealth quintile, level of education, and age.
- As a secondary analysis, the data used for the study lack a number of important factors including trust in scheme management, perceived quality of care, ease of enrolment, etc., which would be useful for better understanding NHIS enrolment.

peer review only

## Introduction

Many low and middle income countries are increasingly implementing prepayment schemes to provide financial risk protection and equitable access to healthcare services for their populations, particularly the poor. (1–3) Prepayment schemes such as social health insurance, if implemented effectively, can reduce out-of-pocket payments (OOP) and associated catastrophic effects on households. (4) The quest to ensure equity in access to healthcare services and to achieve Universal Health Coverage (UHC) has become more imperative, following adoption of the Sustainable Development Goals (SDGs) by member countries of the United Nations (UN). Equity in prepayment schemes is also recognised by WHO as one of the fundamental elements of UHC. (5)

Ghana had a free healthcare system after independence in the 1950s, financed by general taxation. However, this system of healthcare changed when the economy started declining and user fees were partially introduced in the 1970s and 1980s to offset costs of healthcare services delivery. (6–8) Although the OOP somewhat helped public healthcare services providers to recover partial costs of essential medicines and other pharmaceutical products and to raise revenue, the system created inequity in access to healthcare and in some cases led to avoidable deaths. (6,8,9) This situation resulted in the introduction of a National Health Insurance Scheme (NHIS) in 2003 to replace OOP and ensure equity in healthcare access. (10) The NHIS is managed by the National Health Insurance Authority (NHIA), a body mandated by law to regulate both public and private health insurance schemes in the country (11).

Membership in the NHIS is broadly categorised into exempt and non-exempt groups. (11) The exempt groups are members who are exempted from paying premiums to the scheme and they include persons below 18 years old, persons aged 70 years and above, pregnant women, indigent (extreme poor), formal sector workers who contribute to Social Security and National Insurance Trust (SSNIT), and beneficiaries of the Livelihood Empowerment Against Poverty (LEAP) programme. The non-exempt group includes members who pay premiums and enrolment processing fees to the scheme and these are workers in the informal sector of the economy. The NHIS is tax-funded through the National Health Insurance Fund (NHIF) which is based on 2.5% levy on selected goods and services. Other sources of funding are a 2.5% deduction from formal sector workers' SSNIT contributions, premiums from informal sector workers, funds allocated by Parliament, interest from investments, and donor funds and gifts. (11) The premium and enrolment processing fee from the non-exempt group is GHS30.00 (US\$6.33) per year. However, the exempt group only pays a processing fee of GHS8.00 (US\$1.69) for new enrolment and GHS5.00 (US\$1.05) for renewal of membership per year. Relative to the per capital income of GHS8,863 (US\$2,035) (12), the NHIS premium and processing fee represent 0.34%. Again, reference to the daily minimum wage of GHS10.65 (US\$2.25) (13) or GHS2,769.00 (US\$584.18) per year, the NHIS premium and processing fee constitute 0.38%.

Like many health systems around the globe, Ghana's health system is hierarchical with the Ministry of Health (MoH) as apex body mandated to formulate policies to improve health of the population. (14) The MoH has about 12 agencies, comprising of the public, quasi-government and private health facilities, as well health education institutions. The biggest agency is the Ghana Health Service, which is charged with the responsibility of delivering healthcare to the population, as well as implementing policies of the MoH. The Ghana Health

1  
2  
3 Service has a decentralised system of healthcare delivery with a considerable number of  
4 healthcare facilities located across the country. The lowest level of the healthcare delivery  
5 system is the community-based and health planning services (CHPS) compound and the  
6 highest being the tertiary or teaching hospitals at the national level. The number of healthcare  
7 facilities and professionals are unevenly distributed across the country, with the majority  
8 located in the urban areas. (15,16) On the other hand, many of the private healthcare facilities  
9 particularly the faith-based ones are located in remote areas, where they provide about 40%  
10 of healthcare services to the population. (14)  
11  
12  
13

14 Evidence shows that the NHIS has made progress in population coverage and contributed to  
15 utilization of healthcare services and to expansion of healthcare facilities in its short period  
16 of existence. (17) A report of the NHIS shows that the scheme has covered 36% (10.8 million)  
17 of the population as of December 2018 (18). It has 166 district offices and a network of over  
18 4000 healthcare providers comprising both public and private healthcare facilities across the  
19 country. The benefits package reportedly covers 95% of the disease conditions afflicting the  
20 population. It broadly covers outpatient services, inpatient services, oral health, eye care  
21 services, maternity care and emergencies.(19) Preventive services, for example,  
22 immunization and service that have the potential to pose sustainability challenges are  
23 excluded from the benefit package. (9,11)  
24  
25  
26  
27

28 There are few equity-oriented studies of the NHIS in Ghana. A mixed-method study that  
29 evaluated equity in NHIS enrolment in two regions (Central and Eastern) found that more  
30 males had registered in the scheme than females and households in the richest quintile were  
31 significantly more likely to enrol than those in the poorest quintile. (1) The study also found  
32 that old age, higher education, female-headed households, and perceived NHIS benefits were  
33 significantly associated with NHIS enrolment. Another mixed-method study examining why  
34 the NHIS is not reaching the poor used the same two regions and found fewer of the poor to  
35 be covered due to poverty and policy makers' and implementers' lack of commitment to  
36 pursue NHIS's equity goal. (20) Kusi et al., (21) in examining affordability of NHIS  
37 contribution, used three districts from the southern, middle and northern ecological zones of  
38 Ghana and also found that significantly more of the rich were enrolled in the NHIS than the  
39 poor. These three studies were conducted in 2008 and 2011 and employed bivariate and  
40 logistic regression analyses to examine enrolment equity. Other studies that also examined  
41 equity in NHIS enrolment, using data from the 2008 Ghana Demographic Health Survey  
42 (GDHS), employed concentration curves and logistic regression and found that coverage was  
43 highest among the educated, households in the richest quintile, and urban residents. (22,23)  
44  
45  
46  
47

48 This study examined equity in enrolment by concentration curves and logistic regression  
49 analysis. It is necessary now to study equity to assess major NHIS policy reforms instituted in  
50 recent years to make the scheme more attractive to the general public. One such policy is the  
51 intersectoral collaboration with state-owned social protection institutions, for example,  
52 Ministry of Gender and Social Protection, Ministry of Education, LEAP Secretariat, and  
53 Savannah Accelerated Development Authority (SADA), to increase the population of the poor  
54 and vulnerable in the NHIS and to improve equity. Findings from this study can inform policy  
55 making on UHC attainment and contribute to the body of knowledge on equity in NHIS  
56 enrolment and progress towards achieving the SDGs.  
57  
58  
59  
60

## Methods

### Study design and setting

This study analyses secondary data from the sixth round of the Ghana Living Standards Survey conducted between 18 October 2012 and 17 October 2013. The survey covered a representative sample of 18,000 households in 1,200 enumeration areas across the 10 administrative regions of the country. (24) Survey participants had an average age of 44 years and 48 years for male and females, respectively. In the 2010 Population and Housing Census (PHC), Ghana had a population of 24,658,823, with 51.2% being females. The majority of the population resided in the Ashanti (19.4%) and Greater Accra (16.3%) regions, the two most urbanised regions (25) of the country. These two regions also have the lowest poverty rates, whilst those in the northern savannah ecological zones (Northern, Upper East, Upper West, Brong-Ahafo, Volta) have the highest poverty rates. (26) Appendices 1 and 2 provide more details on the population distribution and poverty profile of Ghana.

### Data collection and analysis

Data were sourced from the Ghana Statistical Service and had already been cleaned and managed including creation of sampling weights and income quintiles. Bivariate analyses examined unadjusted relationships between socio-demographic factors and wealth quintiles. Equity in enrolment was assessed using concentration curves and indices, and multivariate logistic regression models to determine factors associated with enrolment. (1,22,27,28) Whilst the concentration curve analyses equity in NHIS enrolment between the poor and the rich, the logistic regression model shows factors associated with enrolment in the scheme. The use of these two analytical techniques is therefore meant to produce reliable findings for informed policy decision-making.

The unit of analysis was the household and we examined cumulative proportion of enrolment by wealth quintiles, decomposed by sex, within and across male-headed and female-headed households. A multivariate logistic regression model was employed to assess whether lower wealth groups were more likely to enrol in the NHIS than higher wealth groups, holding the other socio-demographic variables constant. The outcome or dependent variable 'NHIS enrolment status' was labelled 1 for active card-bearing members and 0 for inactive card-bearing members or those who had never enrolled in the scheme. The main independent variable was 'wealth quintile' and the others (control variables) were socio-demographic characteristics such as age of household head, sex of household head, household size, education level of household head, household head employment status, household setting, and geographic region of residence. Age of household head was categorised based on the Medical Subject Headings (MeSH) age defining. (29,30) Microsoft Excel 2016 and STATA version 13 were used for all analyses.

### Patient and public involvement

Patients were not involved in this study.

## Results

### Characteristics of study participants

A total of 16,772 household heads with an average age of 46 years ( $SD=15.58$ ) and household size of 4 persons ( $SD=2.78$ ) responded to questions on NHIS in the survey (Table 1). Majority of the household heads (47%) were in the age bracket of 25-44 years. Out of the total number

of survey participants, 72% were females; 51% had no formal education; 90% were employed; 24% were in the richest quintile; 56% lived in urban areas; and 12% resided in the Ashanti region. About 71% of households had at least one person enrolled in the NHIS.

### Equity in enrolment

Results of the concentration curve analyses demonstrate that enrolment was slightly more concentrated among poor households (Figure 1). Enrolment by sex also showed that enrolment was more concentrated among households headed by males compared to those headed by females. The concentration indices further revealed that among the study participants, equity was more pronounced in the insured than the uninsured and within male-headed households than female-headed households (Table 2).

### Relationship between household characteristics and wealth quintiles

There were significant differences in all household characteristics by wealth quintiles, except employment status (Table 3). The poorest households (73%) enrolled in the NHIS more than the richest households (67%). Interestingly, the richer households had the second highest enrolment (72.4%) in the scheme. Majority of the poorest households (80.1%) had no formal education compared to about 25% of the richest households with tertiary level education. Similarly, majority of the poorest households (91%) were more employed as were the richest households (89%), and there were more females (79%) in the poorest quintile than in the richest quintile (67%). There were also significantly more household heads aged 45 years or more in the poorest quintile than those in the richest quintile, and more households in the poorest quintile (86%) living in urban settings than households in the richest quintiles (30%).

Results of the multivariate logistic regression showed that the likelihood of enrolling in the NHIS increases from poorer to richest quintile, low to high level of education, and young adults to older adults (Table 4). Females (OR: 1.52; 95% CI: 1.39–1.65) and persons living in the Upper East (OR: 5.99; 95% CI: 4.91–7.31), Upper West (OR: 5.04; 95% CI: 4.14–6.15), Brong-Ahafo (OR: 3.06; 95% CI: 2.58–3.62), Volta (OR: 2.04; 95% CI: 1.74–2.39), and Northern (OR: 1.32; 95% CI: 1.13–1.54) regions were significantly more likely to enrol in the NHIS than their respective reference categories. Surprisingly, the employed were less likely to enrol in the NHIS (OR=0.99; 95% CI 0.87–1.12) although not significantly so. The unadjusted odds ratios (OR) showed similar associations except for wealth quintile, the explanatory variable of interest, which showed a decreased likelihood of enrolling in the NHIS from poorer to richest.

### Discussion

This study examined equity in NHIS enrolment employing data from the Ghana Living Standards Survey (round 6), which was conducted between October 2012 and October 2013. The findings show inequity in enrolment and significant associations between socio-demographic factors and NHIS enrolment. Among households surveyed, enrolment is disproportionately concentrated among poor households especially those headed by males. The possible explanation relates to policy changes made over the last few years to increase enrolment in the scheme. One such policy is the deliberate attempt to increase numbers of the poor and vulnerable in the scheme through enrolment of the Livelihood Empowerment Against Poverty (LEAP) beneficiaries, students in secondary and tertiary institutions in Ghana, prisoners, and individuals living in less developed geographic regions, particularly those in the northern savannah ecological zone, where there is high prevalence of poverty. The



1  
2  
3 disproportionate concentration of enrolment among poor households contradicts previous  
4 studies on the NHIS, (1,20–22,31,32) due possibly to the years in which those studies were  
5 conducted (2008 and 2011), as well as the limited regional scope (three administrative  
6 regions except the 2008 Demographic Health Survey that covered the entire country). This  
7 present study employs a nationally representative survey.  
8  
9

10  
11 Our study also shows that a number of socio-demographic factors are significantly associated  
12 with NHIS enrolment. Although unadjusted findings illustrate that enrolment is concentrated  
13 among poor households, multivariate findings illustrate that the odds of enrolling in the  
14 scheme increases with wealth quintiles, that is, the rich are more likely to enrol than the poor.  
15 This may be attributed to evidence that the rich are more able to afford the cost of enrolling  
16 in the health insurance programme than the poor. (1,20,33,34) Besides, as explained earlier,  
17 the policy decision to deliberately enrol the poor might have contributed to their higher  
18 numbers in the NHIS, but voluntarily other factors other than being poor contribute to  
19 enrolment in the scheme. Individuals with higher levels of education are more likely to enrol  
20 in the NHIS compared to those with no formal education; females are more likely to enrol  
21 than males; and older adults are more likely to enrol than young adults, consistent with  
22 previous studies. (1,22,32–35) The employed are less likely to enrol compared to the  
23 unemployed. The plausible explanation is that the employed may be able to afford OOP for  
24 healthcare services because they are more economically resourced than the unemployed.  
25 This result runs counter to earlier studies. (21,35)  
26  
27  
28  
29

30  
31 Findings from this study also reveal that individuals residing in rural settings are significantly  
32 less likely to enrol in the NHIS compared to those living in urban areas, consistent with  
33 previous studies, (32,35) but contradicting a study by Jehu-Appiah et al, (1) One reason may  
34 be due to poverty; prior studies showed that the majority of rural dwellers are unable to  
35 afford the NHIS premium and processing or renewal fee. (20,31,34,36–38) This study's  
36 findings also show that the odds of enrolling in the NHIS increases with household size,  
37 consistent with other studies, (22,33,34) because larger households may be risk averse and  
38 thus would enrol in the NHIS to seek financial risk protection against their healthcare costs  
39 and to avoid catastrophic OOP. Our findings also reveal that individuals residing in less  
40 developed regions of the country are significantly more likely to enrol in the scheme  
41 compared to those in developed regions. Again, this may be attributed to policy reforms  
42 focused on enrolling individuals living in deprived regions, particularly those in the northern  
43 savannah ecological zones, comprising the Northern, Upper East, Upper West, and some parts  
44 of Brong-Ahafo and Volta regions, (24) consistent with some studies (22,23) and  
45 contradicting other. (35)  
46  
47  
48  
49

50  
51 Our study's primary limitation is that the data lacked several important factors (such as trust  
52 in scheme management, perceived quality of care, ease of enrolment, etc.), which would be  
53 useful for better understanding NHIS enrolment. Nonetheless, the variables used in the  
54 multivariate logistic regression modelling did not significantly affect model robustness.  
55

## 56 **Conclusion**

57  
58 The study reveals that from 2012–2013, enrolment in the NHIS was higher among poor  
59 households, particularly male-headed households, although the multivariate analyses  
60 demonstrated that the likelihood of NHIS enrolment increased from poorer to richest quintile,

1  
2  
3 low to high level of education and young adults to older adults. Whilst the NHIS strives to  
4 achieve its pro-poor goal of providing financial risk protection for the poor and vulnerable in  
5 society, equity must be addressed within and across the entire population. Adequate funds  
6 are also required to cover the anticipated increase in medical claims costs because as more  
7 poor and vulnerable groups enrol in the scheme, the claims cost is likely to escalate and  
8 threaten the scheme's sustainability. Thus, policy decisions to ensure equity in enrolment  
9 must also ensure commensurate funding to avoid financial uncertainty and collapse. Further  
10 research on equity in healthcare services utilization, expenditures, and accreditation of  
11 healthcare providers is needed to provide a fuller picture of equity assessment in the NHIS.  
12  
13  
14

### 15 **Ethics approval**

16 This study is a secondary analysis of the Ghana Living Standard Survey (round 6) data,  
17 however formal approval was obtained from the Ghana Statistical Service to use the data.  
18  
19

### 20 **Funding**

21 None  
22  
23

### 24 **Competing interests**

25 ENB is an employee of the National Health Insurance Authority, however his affiliation did  
26 not influence findings of this study. JPR and JN declare no competing interests.  
27  
28

### 29 **Contributors**

30 ENB, JPR and JN conceived and designed the study. JN retrieved the data and ENB analysed  
31 the data and drafted the manuscript. JPR and JN provided intellectual contributions to  
32 develop and revise the manuscript. All the authors read and approved the manuscript for  
33 publication.  
34  
35

### 36 **Patient consent**

37 Not applicable  
38  
39

### 40 **Data sharing statement**

41 No additional data available  
42  
43

### 44 **Acknowledgements**

45 We are grateful to the Ghana Statistical Service for the provision of the GLSS data for this  
46 study. We also thank all contributors and reviewers for their comments and time.  
47  
48  
49  
50  
51  
52  
53  
54  
55  
56  
57  
58  
59  
60

## Reference

1. Jehu-Appiah C, Aryeetey G, Spaan E, de Hoop T, Agyepong I, Baltussen R. Equity aspects of the National Health Insurance Scheme in Ghana: Who is enrolling, who is not and why? *Soc Sci Med*. 2011;72(2):157–65.
2. Wiseman V, Thabrany H, Asante A, Haemmerli M, Kosen S, Gilson L, et al. An evaluation of health systems equity in Indonesia: study protocol. *Int J Equity Health*. 2018;(17):1–9.
3. Asante A, Price J, Hayen A, Jan S, Wiseman V. Equity in Health Care Financing in Low- and Middle-Income Countries : A Systematic Review of Evidence from Studies Using Benefit and Financing Incidence Analyses. *PLoS One*. 2016;11(4):1–20.
4. Ruger JP. An Alternative Framework for Analyzing Financial Protection in Health. *PLoS Med*. 2012;9(8):e1001294.
5. WHO. Health systems financing: the path to universal coverage. *World Heal Rep*. 2010;1–128.
6. Waddington C, Enyimayew KA. A price to pay, part 2: The impact of user charges in the Volta region of Ghana. *Int J Health Plann Manage*. 1990;5(4):287–312.
7. Asenso-Okyere WK, Anum A, Osei-Akoto I, Adukonu A. Cost recovery in Ghana: are there any changes in health care seeking behaviour? *Health Policy Plan*. 1998 Jun [cited 2018 Sep 12];13(2):181–8.
8. Nyonator F, Kutzin J. Health for some? The effects of user fees in the Volta Region of Ghana. *Health Policy Plan*. 1999;14(4):329–41.
9. Ministry of Health. National Health Insurance Policy framework for Ghana: Revised Version. Accra; 2004 [https://www.ghanahealthservice.org/downloads/NHI\\_policy\\_framework.pdf](https://www.ghanahealthservice.org/downloads/NHI_policy_framework.pdf). Accessed: 17 Dec 2017.
10. Parliament of Ghana. National Health Insurance Act, 2003 (Act 650). Insurance Act, 650 Accra, Ghana; 2003 p. 1–39.
11. Parliament of Ghana. National Health Insurance Act, 2012 (Act 852). Accra, Ghana: Parliament of Ghana; 2012 p. 1–55.
12. Attah Yeboah O. Per capita GDP increases to US\$2,035 after rebasing ...but has little effect on poverty. *Business and Financial Times Online*. 2018 . Accessed 8 Apr 2019. <https://thebftonline.com/2018/economy/per-capita-gdp-increases-to-us2035-after-rebasing-but-has-little-effect-on-poverty/>
13. Nyavor G. Minimum wage goes up by 10%; now GHS10.65. *Myjoyonline.com*. 2018 <https://www.myjoyonline.com/business/2018/July-27th/minimum-wage-goes-up-by-now-gh1065.php>. Accessed 8 Apr 2019.
14. Aseweh Abor P, Abekah-Nkrumah G, Abor J. An examination of hospital governance in Ghana. *Leadersh Heal Serv*. 2008;21(1):47–60.
15. Andoh-Adjei F-X, Nsiah-boateng E, Asante FA, Spaan E, Velden K Van Der. Perception of quality health care delivery under capitation payment : a cross-sectional survey of health insurance subscribers and providers in Ghana. *BMC Fam Pract*. 2018;19(37):1–12.
16. Duku SKO, Nketiah-Amponsah E, Janssens W, Pradhan M. Perceptions of healthcare quality in Ghana: Does health insurance status matter? *PLoS One*. 2018;13(1):1–17.
17. National Development Planning Commission. 2008 Citizens' assessment of the national health insurance scheme: towards a sustainable health care financing arrangement that protects the poor. Accra; 2009.
18. National Health Insurance Authority. Active membership report for December 2018

- (final as at April 1 2019). Accra; 2019.
19. National Health Insurance Authority. Benefits Package. National Health Insurance Scheme. 2019. <http://www.nhis.gov.gh/benefits.aspx> . Accessed 8 Apr 2019.
  20. Kotoh AM, Van Der Geest S. Why are the poor less covered in Ghana's national health insurance? A critical analysis of policy and practice. *Int J Equity Health*. 2016;15(34):1–11.
  21. Kusi A, Enemark U, Hansen KS, Asante FA. Refusal to enrol in Ghana ' s National Health Insurance Scheme : is affordability the problem ? *Int J Equity Health*. 2015;14(2):1–14.
  22. Dake FAA. Examining equity in health insurance coverage : an analysis of Ghana ' s National Health Insurance Scheme. *Int J Equity Health*. 2018;17(85):1–10.
  23. Dixon J, Tenkorang EY, Luginaah I. Ghana's National Health Insurance Scheme: Helping the Poor or Leaving Them Behind? *Environ Plan C Gov Policy*. 2011 Dec;29(6):1102–15.
  24. Ghana Statistical Service. Ghana Living Standards Survey Round 6 (GLSS 6): Main Report. Accra; 2014. [http://www.statsghana.gov.gh/docfiles/glss6/GLSS6\\_Main Report.pdf](http://www.statsghana.gov.gh/docfiles/glss6/GLSS6_Main Report.pdf). Accessed 21 Aug 2017.
  25. Ghana Statistical Service. 2010 Population & housing census: summary report of final results. Accra; 2012. [http://statsghana.gov.gh/docfiles/2010phc/Census2010\\_Summary\\_report\\_of\\_final\\_results.pdf](http://statsghana.gov.gh/docfiles/2010phc/Census2010_Summary_report_of_final_results.pdf). Accessed 21 Aug 2017.
  26. Ghana Statistical Service. Ghana Living Standards Survey Round 6 (GLSS 6): Poverty Profile in Ghana (2005-2013). Accra; 2014. [http://www.statsghana.gov.gh/docfiles/glss6/GLSS6\\_Poverty Profile in Ghana.pdf](http://www.statsghana.gov.gh/docfiles/glss6/GLSS6_Poverty Profile in Ghana.pdf). Accessed 29 Jan 2017.
  27. Allin S, Masseria C, Sorenson C, Papanicolas I, Mossialos E. Measuring inequalities in access to health care. A review of the indices. *London Sch Econ Polit Sci*. 2007;(June):1–24.
  28. O'Donnell O, Van Doorslaer DE, Wagstaff A, Lindelow M. Analyzing Health Equity Using Household Survey Data: A Guide to Techniques and Their Implementation. Washington DC: The World Bank; 2008. [www.worldbank.org](http://www.worldbank.org). Accessed 22 Sep 2018.
  29. Geifman N, Cohen R, Rubin E. Redefining meaningful age groups in the context of disease. *Age (Dordr)*. 2013 Dec;35(6):2357–66.
  30. Kastner M, Wilczynski NL, Walker-Dilks C, McKibbin KA, Haynes B. Age-specific search strategies for Medline. *J Med Internet Res*. 2006 Oct 25;8(4):e25.
  31. Kotoh AM, Aryeetey GC, Van Der Geest S. Factors That Influence Enrolment and Retention in Ghana' National Health Insurance Scheme. *Int J Heal Policy Manag Int J Heal Policy Manag*. 2018;7(5):443–54.
  32. Akazili J, Welaga P, Bawah A, Achana FS, Oduro A, Awoonor-Williams JK, et al. Is Ghana's pro-poor health insurance scheme really for the poor? Evidence from Northern Ghana. *BMC Health Serv Res*. 2014;14(637):1–9.
  33. Dror DM, Hossain SAS, Majumdar A, Pérez Koehlmoos TL, John D, Panda PK. What Factors Affect Voluntary Uptake of Community-Based Health Insurance Schemes in Low- and Middle-Income Countries? A Systematic Review and Meta-Analysis. *PLoS One*. 2016;11(8):1–31.
  34. Adebayo EF, Uthman OA, Wiysonge CS, Stern EA, Lamont KT, Ataguba JE. A systematic review of factors that affect uptake of community-based health insurance

- in low-income and middle- income countries. *BMC Health Serv Res.* 2015;15(543):1–13.
35. van der Wielen N, Falkingham J, Channon AA. Determinants of National Health Insurance enrolment in Ghana across the life course: Are the results consistent between surveys? *Int J Equity Health.* 2018;17(49):1–14.
36. Fenny AP, Kusi A, Arhinful DK, Asante FA. Factors contributing to low uptake and renewal of health insurance: a qualitative study in Ghana. *Glob Heal Res Policy.* 2016;1(18):1–10.
37. Agyepong IA, Nana D, Abankwah Y, Abroso A, Chun C, Nii J, et al. The “Universal” in UHC and Ghana’s National Health Insurance Scheme: policy and implementation challenges and dilemmas of a lower middle income country. *BMC Health Serv Res.* 2016;16(504):1–14.
38. Atinga RA, Abihiro GA, Kuganab-Lem RB. Factors influencing the decision to drop out of health insurance enrolment among urban slum dwellers in Ghana. *Trop Med Int Heal.* 2015;20(3):312–21.

**Table 1:** Individual and household characteristics

| Variable                     | % (n=16,772) |
|------------------------------|--------------|
| <b>NHIS status</b>           |              |
| Covered                      | 70.5         |
| Not covered                  | 29.5         |
| <b>Highest Education</b>     |              |
| None                         | 50.7         |
| Primary                      | 30.5         |
| Secondary                    | 8.5          |
| Tertiary                     | 10.3         |
| <b>Employment status</b>     |              |
| Employed                     | 89.5         |
| Unemployed                   | 10.5         |
| <b>Wealth quintile</b>       |              |
| Poorest                      | 20.1         |
| Poorer                       | 17.6         |
| Middle                       | 17.9         |
| Richer                       | 20.1         |
| Richest                      | 24.3         |
| <b>Sex of household head</b> |              |
| Female                       | 71.8         |
| Male                         | 28.2         |
| <b>Age of household head</b> |              |
| 19–24                        | 4.9          |
| 25–44                        | 47.1         |
| 45–64                        | 33.3         |
| 65–79                        | 11.7         |
| 80+                          | 3.0          |
| <b>Household size, M(SD)</b> | 4.3 (2.78)   |
| <b>Household setting</b>     |              |

|                          |      |
|--------------------------|------|
| Rural                    | 44.4 |
| Urban                    | 55.6 |
| <b>Geographic region</b> |      |
| Western                  | 10.2 |
| Central                  | 9.6  |
| Greater Accra            | 11.5 |
| Volta                    | 9.4  |
| Eastern                  | 10.8 |
| Ashanti                  | 11.8 |
| Brong Ahafo              | 9.7  |
| Northern                 | 10.2 |
| Upper East               | 8.6  |
| Upper West               | 8.3  |

M: mean; SD: standard deviation

**Table 2:** Concentration index (CI) showing inequity in NHIS enrolment

| Wealth quintile | Total          |               | Within households (HH) |               |                |               | Between households (HH) |                |
|-----------------|----------------|---------------|------------------------|---------------|----------------|---------------|-------------------------|----------------|
|                 | Enrolled       | Not enrolled  | Female-headed HH       |               | Male-headed HH |               | Female                  | Male           |
|                 |                |               | Enrolled               | Not enrolled  | Enrolled       | Not enrolled  |                         |                |
| Poorest         | -0.0009        | 0.0021        | -0.0023                | 0.0060        | -0.0009        | 0.0020        | 0.0073                  | -0.0029        |
| Poorer          | -0.0014        | 0.0035        | 0.0061                 | -0.0153       | -0.0010        | 0.0026        | 0.0096                  | -0.0039        |
| Middle          | 0.0018         | -0.0039       | -0.0085                | 0.0234        | -0.0002        | 0.0011        | 0.0268                  | -0.0108        |
| Richer          | -0.0116        | 0.0290        | 0.0000                 | 0.0000        | -0.0135        | 0.0321        | 0.0455                  | -0.0185        |
| Richest         | 0.0000         | 0.0000        | -0.0056                | 0.0167        | 0.0000         | 0.0000        | 0.0000                  | 0.0000         |
| <b>Total</b>    | <b>-0.0120</b> | <b>0.0307</b> | <b>-0.0103</b>         | <b>0.0307</b> | <b>-0.0156</b> | <b>0.0378</b> | <b>0.0891</b>           | <b>-0.0362</b> |

**Table 3:** Differences in household characteristics by wealth quintile (n=16,772)

| Variable                     | Q1 (Poorest) | Q2 (Poorer) | Q3 (Middle) | Q4 (Richer) | Q5 (Richest) | Total | Pearson's $\chi^2$ |
|------------------------------|--------------|-------------|-------------|-------------|--------------|-------|--------------------|
| <b>NHIS status</b>           |              |             |             |             |              |       | 0.000              |
| Enrolled                     | 72.6         | 70.9        | 70.3        | 72.4        | 67.0         | 70.5  |                    |
| Not enrolled                 | 27.4         | 29.1        | 29.7        | 27.6        | 33.0         | 29.5  |                    |
| <b>Highest education</b>     |              |             |             |             |              |       | 0.000              |
| None                         | 80.1         | 62.7        | 51.9        | 39.8        | 25.8         | 50.7  |                    |
| Primary                      | 16.3         | 28.7        | 34.8        | 38.7        | 33.6         | 30.5  |                    |
| Secondary                    | 2.1          | 5.4         | 7.0         | 10.1        | 15.8         | 8.5   |                    |
| Tertiary                     | 1.5          | 3.2         | 6.3         | 11.4        | 24.8         | 10.3  |                    |
| <b>Employment status</b>     |              |             |             |             |              |       | 0.065              |
| Employed                     | 90.9         | 89.6        | 90.5        | 88.7        | 88.8         | 89.5  |                    |
| Unemployed                   | 9.1          | 10.4        | 9.5         | 11.3        | 11.2         | 10.5  |                    |
| <b>Sex</b>                   |              |             |             |             |              |       | 0.000              |
| Female                       | 79.1         | 73.1        | 71.7        | 69.4        | 66.9         | 71.8  |                    |
| Male                         | 20.9         | 26.9        | 28.3        | 30.6        | 33.1         | 28.2  |                    |
| <b>Age of household head</b> |              |             |             |             |              |       | 0.000              |
| 19–24                        | 2.4          | 4.1         | 4.4         | 5.9         | 7.0          | 4.9   |                    |
| 25–44                        | 40.9         | 43.8        | 46.6        | 48.4        | 54.1         | 47.1  |                    |
| 45–64                        | 37.5         | 35.0        | 34.7        | 32.0        | 28.7         | 33.3  |                    |

|                          |      |      |      |      |      |       |       |
|--------------------------|------|------|------|------|------|-------|-------|
| 65–79                    | 14.9 | 14.2 | 11.4 | 10.9 | 7.9  | 11.7  |       |
| 80+                      | 4.3  | 2.9  | 2.9  | 2.8  | 2.3  | 3.0   |       |
| <b>Household size</b>    | 20.1 | 17.7 | 17.9 | 20.1 | 24.3 | 100.0 | 0.000 |
| <b>Household setting</b> |      |      |      |      |      |       | 0.000 |
| Rural                    | 13.7 | 31.1 | 43.6 | 56.0 | 70.4 | 44.4  |       |
| Urban                    | 86.3 | 68.9 | 56.4 | 44.0 | 29.6 | 55.6  |       |
| <b>Geographic region</b> |      |      |      |      |      |       | 0.000 |
| Western                  | 5.6  | 9.4  | 11.1 | 12.8 | 11.9 | 10.2  |       |
| Central                  | 5.1  | 10.6 | 12.2 | 10.8 | 9.5  | 9.6   |       |
| Greater Accra            | 2.3  | 4.4  | 8.0  | 14.0 | 24.7 | 11.5  |       |
| Volta                    | 8.7  | 11.0 | 9.8  | 10.1 | 7.9  | 9.4   |       |
| Eastern                  | 7.0  | 11.8 | 13.8 | 13.1 | 8.9  | 10.8  |       |
| Ashanti                  | 4.0  | 9.2  | 11.9 | 14.6 | 17.7 | 11.8  |       |
| Brong-Ahafo              | 8.4  | 11.9 | 11.0 | 9.6  | 8.2  | 9.7   |       |
| Northern                 | 20.0 | 12.9 | 9.6  | 6.4  | 3.6  | 10.2  |       |
| Upper East               | 14.7 | 11.4 | 8.3  | 6.2  | 3.8  | 8.6   |       |
| Upper West               | 24.2 | 7.4  | 4.2  | 2.5  | 3.8  | 8.3   |       |

**Table 4:** Multivariate logistic regression model of enrolling in the NHIS

| Variable                     | Unadjusted OR | [95% C.I.] | Adjusted OR | [95% C.I.] |
|------------------------------|---------------|------------|-------------|------------|
| <b>Wealth quintile</b>       |               |            |             |            |
| Poorest                      | 1.00          |            | 1.00        |            |
| Poorer                       | 0.92          | 0.82–1.02  | 1.33***     | 1.17–1.50  |
| Middle                       | 0.89*         | 0.79–0.99  | 1.54***     | 1.36–1.75  |
| Richer                       | 0.98          | 0.88–1.09  | 1.94***     | 1.70–2.22  |
| Richest                      | 0.76***       | 0.69–0.84  | 1.67***     | 1.45–1.91  |
| <b>Highest education</b>     |               |            |             |            |
| None                         | 1.00          |            | 1.00        |            |
| Primary                      | 1.05          | 0.98–1.14  | 1.65***     | 1.51–1.80  |
| Secondary                    | 1.27***       | 1.12–1.44  | 2.35***     | 2.03–2.72  |
| Tertiary                     | 1.75***       | 1.55–1.99  | 2.87***     | 2.48–3.32  |
| <b>Employment status</b>     |               |            |             |            |
| Unemployed                   | 1.00          |            | 1.00        |            |
| Employed                     | 0.85**        | 0.76–0.95  | 0.99        | 0.87–1.12  |
| <b>Sex of household head</b> |               |            |             |            |
| Male                         | 1.00          |            | 1.00        |            |
| Female                       | 1.11**        | 1.03–1.19  | 1.52***     | 1.39–1.65  |
| <b>Age of household head</b> |               |            |             |            |
| 19–24                        | 1.00          |            | 1.00        |            |
| 25–44                        | 1.99***       | 1.72–2.31  | 1.53***     | 1.31–1.79  |
| 45–64                        | 2.38***       | 2.05–2.77  | 1.69***     | 1.43–1.99  |
| 65–79                        | 3.43***       | 2.87–4.08  | 3.05***     | 2.51–3.69  |
| 80+                          | 3.18***       | 2.47–4.08  | 3.28***     | 2.49–4.34  |
| <b>Household size</b>        | 1.17***       | 1.15–1.18  | 1.23***     | 1.20–1.25  |
| <b>Household setting</b>     |               |            |             |            |
| Urban                        | 1.00          |            | 1.00        |            |
| Rural                        | 0.97          | 0.91–1.04  | 0.75***     | 0.69–0.82  |
| <b>Geographic region</b>     |               |            |             |            |

|                |         |           |         |           |
|----------------|---------|-----------|---------|-----------|
| Western        | 1.00    |           | 1.00    |           |
| Central        | 0.64*** | 0.55–0.73 | 0.63*** | 0.54–0.73 |
| Greater Accra  | 0.79**  | 0.69–0.90 | 0.63*** | 0.52–0.69 |
| Volta          | 1.89*** | 1.62–2.21 | 2.04*** | 1.73–2.39 |
| Eastern        | 1.34*** | 1.16–1.53 | 1.39*** | 1.20–1.62 |
| Ashanti        | 1.16*   | 1.01–1.32 | 1.08    | 0.94–1.25 |
| Brong-Ahafo    | 2.68*** | 2.27–3.15 | 3.06*** | 2.58–3.62 |
| Northern       | 1.07    | 0.92–1.22 | 1.32*** | 1.13–1.54 |
| Upper East     | 4.30*** | 3.56–5.19 | 5.99*** | 4.91–7.31 |
| Upper West     | 3.62*** | 3.01–4.33 | 5.04*** | 4.14–6.15 |
| _cons          |         |           | 0.23*** | 0.18–0.29 |
| Number of obs. | 16,693  |           |         |           |
| LR chi2(24)    | 2236.60 |           |         |           |
| Prob > chi2    | 0.0000  |           |         |           |
| Pseudo R2      | 0.1106  |           |         |           |

OR: odds ratio; \* $p < 0.10$ ; \*\* $p < 0.05$ ; \*\*\* $p < 0.01$ ; \*\*\* $p < 0.001$ ; Control variables: education of household head, employment status of household head, sex of household, age of household head, household size, household setting and geographic region

#### Figure legends

Figure 1: Concentration curves for enrolment in NHIS



1  
2  
3  
4  
5  
6  
7  
8  
9  
10  
11  
12  
13  
14  
15  
16  
17  
18  
19  
20  
21  
22  
23  
24  
25  
26  
27  
28  
29  
30  
31  
32  
33  
34  
35  
36  
37  
38  
39  
40  
41  
42  
43  
44  
45  
46

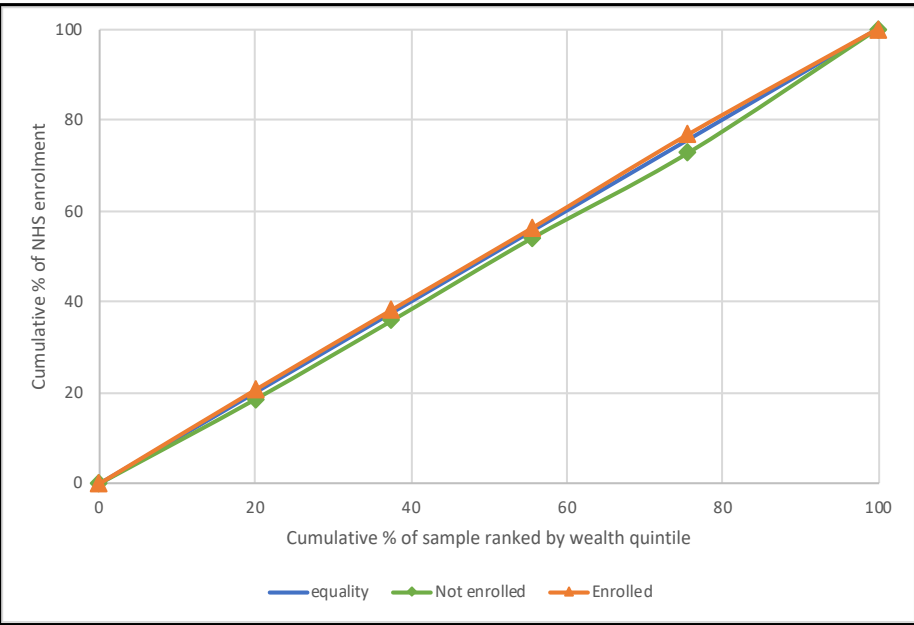

a: Concentration curves for NHIS enrolment

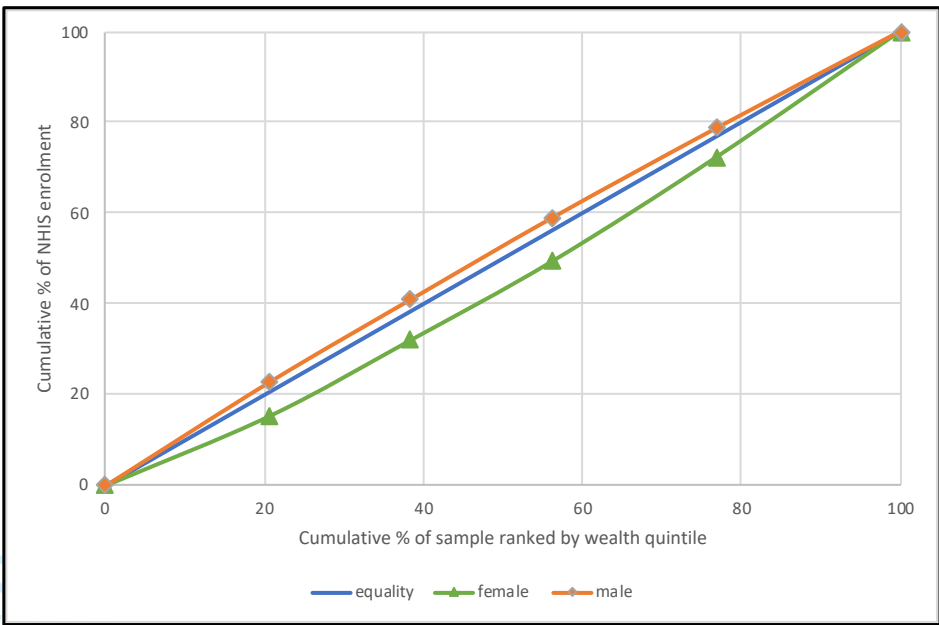

b: Concentration curves for NHIS enrolment by sex

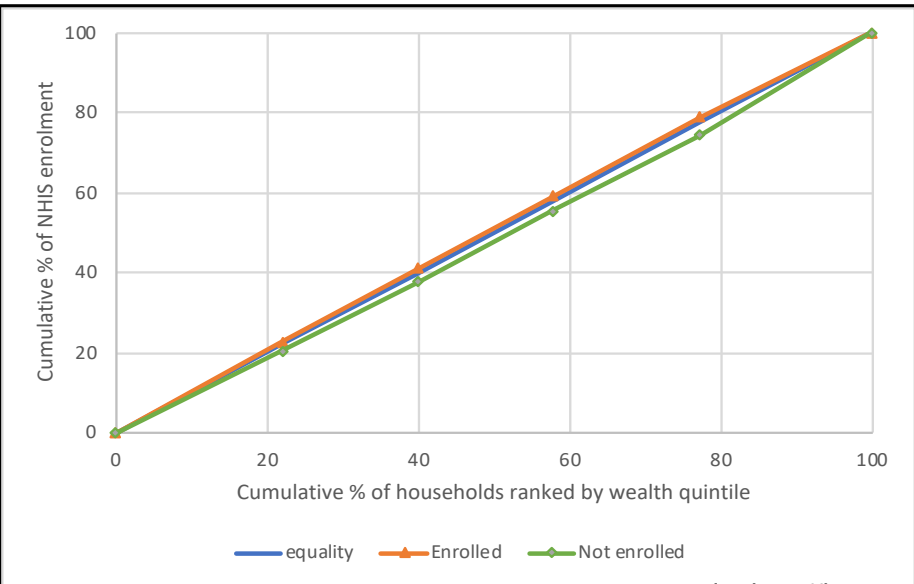

c: Concentration curves for NHIS enrolment in male-headed households

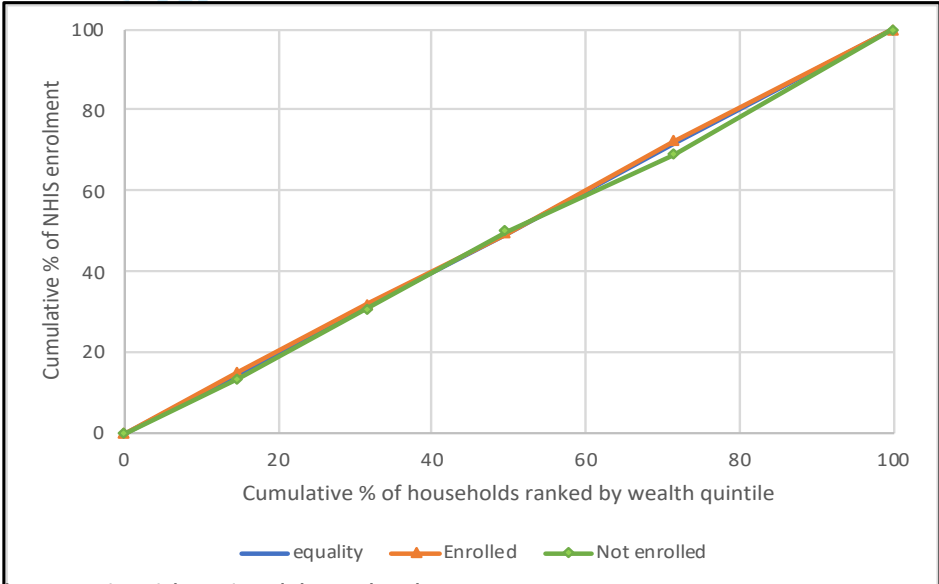

d: Concentration curves for NHIS enrolment in female-headed households

Figure 1: Concentration curves for enrolment in NHIS

For peer review only - <http://bmjopen.bmj.com/site/about/guidelines.xhtml>

**Appendix 1:** Distribution of population by region, sex and locality of enumeration, 2010

| Region             | Total Population  | Male              | Female            | Locality of enumeration |                   | Share of Population (%) | Proportion urban | Sex Ratio   | Percentage increase over 2000 | Intercensal Growth Rate (%) |
|--------------------|-------------------|-------------------|-------------------|-------------------------|-------------------|-------------------------|------------------|-------------|-------------------------------|-----------------------------|
|                    |                   |                   |                   | Urban                   | Rural             |                         |                  |             |                               |                             |
| <b>All Regions</b> | <b>24,658,823</b> | <b>12,024,845</b> | <b>12,633,978</b> | <b>12,545,229</b>       | <b>12,113,594</b> | <b>100.0</b>            | <b>50.9</b>      | <b>95.2</b> | <b>30.4</b>                   | <b>2.5</b>                  |
| Western            | 2,376,021         | 1,187,774         | 1,188,247         | 1,007,969               | 1,368,052         | 9.6                     | 42.4             | 100.0       | 23.5                          | 2.0                         |
| Central            | 2,201,863         | 1,050,112         | 1,151,751         | 1,037,878               | 1,163,985         | 8.9                     | 47.1             | 91.2        | 38.1                          | 3.1                         |
| Greater Accra      | 4,010,054         | 1,938,225         | 2,071,829         | 3,630,955               | 379,099           | 16.3                    | 90.5             | 93.6        | 38.0                          | 3.1                         |
| Volta              | 2,118,252         | 1,019,398         | 1,098,854         | 713,735                 | 1,404,517         | 8.6                     | 33.7             | 92.8        | 29.5                          | 2.5                         |
| Eastern            | 2,633,154         | 1,290,539         | 1,342,615         | 1,143,918               | 1,489,236         | 10.7                    | 43.4             | 96.1        | 25.0                          | 2.1                         |
| Ashanti            | 4,780,380         | 2,316,052         | 2,464,328         | 2,897,290               | 1,883,090         | 19.4                    | 60.6             | 94.0        | 32.3                          | 2.7                         |
| Brong Ahafo        | 2,310,983         | 1,145,271         | 1,165,712         | 1,028,473               | 1,282,510         | 9.4                     | 44.5             | 98.2        | 27.3                          | 2.3                         |
| Northern           | 2,479,461         | 1,229,887         | 1,249,574         | 750,712                 | 1,728,749         | 10.1                    | 30.3             | 98.4        | 36.2                          | 2.9                         |
| Upper East         | 1,046,545         | 506,405           | 540,140           | 219,646                 | 826,899           | 4.2                     | 21.0             | 93.8        | 13.7                          | 1.2                         |
| Upper West         | 702,110           | 341,182           | 360,928           | 114,653                 | 587,457           | 2.8                     | 16.3             | 94.5        | 21.8                          | 1.9                         |

**Source:** Adapted from Ghana Statistical Service <sup>18</sup>

**Appendix 2:** Poverty incidence and poverty gap by region (%) 2005/06–2012/13 (Poverty line=GHS1,314=US\$277.22)

| Region         | Poverty incidence (P <sub>0</sub> ) | Contribution to total poverty (C <sub>0</sub> ) | Poverty gap (P <sub>1</sub> ) | Contribution to total poverty gap (C <sub>1</sub> ) | Poverty incidence (P <sub>0</sub> ) | Contribution to total poverty (C <sub>0</sub> ) | Poverty gap (P <sub>1</sub> ) | Contribution to total poverty gap |
|----------------|-------------------------------------|-------------------------------------------------|-------------------------------|-----------------------------------------------------|-------------------------------------|-------------------------------------------------|-------------------------------|-----------------------------------|
| <b>2012/13</b> |                                     |                                                 |                               |                                                     | <b>2005/06</b>                      |                                                 |                               |                                   |
| Western        | 20.9                                | 7.9                                             | 5.7                           | 6.8                                                 | 22.9                                | 7.3                                             | 5.4                           | 5.0                               |
| Central        | 18.8                                | 6.9                                             | 5.6                           | 6.4                                                 | 23.4                                | 6.4                                             | 5.6                           | 4.4                               |
| Greater Accra  | 5.6                                 | 3.8                                             | 1.6                           | 3.5                                                 | 13.5                                | 5.9                                             | 3.7                           | 4.7                               |
| Volta          | 33.8                                | 12.1                                            | 9.8                           | 11.0                                                | 37.3                                | 8.7                                             | 9.2                           | 6.2                               |
| Eastern        | 21.7                                | 9.3                                             | 5.8                           | 7.8                                                 | 17.8                                | 7.5                                             | 4.2                           | 5.2                               |
| Ashanti        | 14.8                                | 12.0                                            | 3.5                           | 9.0                                                 | 24.0                                | 12.6                                            | 6.4                           | 9.8                               |
| Brong Ahafo    | 27.9                                | 11.4                                            | 7.4                           | 9.4                                                 | 34.0                                | 9.8                                             | 9.5                           | 7.9                               |
| Northern       | 50.4                                | 20.8                                            | 19.3                          | 24.9                                                | 55.7                                | 21.0                                            | 23.0                          | 25.2                              |
| Upper East     | 44.4                                | 7.4                                             | 17.2                          | 9.0                                                 | 72.9                                | 10.9                                            | 35.3                          | 15.3                              |
| Upper West     | 70.7                                | 8.4                                             | 33.2                          | 12.3                                                | 89.1                                | 10.0                                            | 50.7                          | 16.4                              |
| All Ghana      | 24.2                                | 100.0                                           | 7.8                           | 100.0                                               | 31.9                                | 100.0                                           | 11.0                          | 100.0                             |

Source: Adapted from Ghana Statistical Service <sup>19</sup>

STROBE Statement—Checklist of items that should be included in reports of *cross-sectional studies*

|                              | Item No | Recommendation                                                                                                                                                                                                                                                                                                                                                                                                |
|------------------------------|---------|---------------------------------------------------------------------------------------------------------------------------------------------------------------------------------------------------------------------------------------------------------------------------------------------------------------------------------------------------------------------------------------------------------------|
| <b>Title and abstract</b>    | 1       | (a) Indicate the study's design with a commonly used term in the title or the abstract<br>(b) Provide in the abstract an informative and balanced summary of what was done and what was found                                                                                                                                                                                                                 |
| <b>Introduction</b>          |         |                                                                                                                                                                                                                                                                                                                                                                                                               |
| Background/rationale         | 2       | Explain the scientific background and rationale for the investigation being reported                                                                                                                                                                                                                                                                                                                          |
| Objectives                   | 3       | State specific objectives, including any prespecified hypotheses                                                                                                                                                                                                                                                                                                                                              |
| <b>Methods</b>               |         |                                                                                                                                                                                                                                                                                                                                                                                                               |
| Study design                 | 4       | Present key elements of study design early in the paper                                                                                                                                                                                                                                                                                                                                                       |
| Setting                      | 5       | Describe the setting, locations, and relevant dates, including periods of recruitment, exposure, follow-up, and data collection                                                                                                                                                                                                                                                                               |
| Participants                 | 6       | (a) Give the eligibility criteria, and the sources and methods of selection of participants                                                                                                                                                                                                                                                                                                                   |
| Variables                    | 7       | Clearly define all outcomes, exposures, predictors, potential confounders, and effect modifiers. Give diagnostic criteria, if applicable                                                                                                                                                                                                                                                                      |
| Data sources/<br>measurement | 8*      | For each variable of interest, give sources of data and details of methods of assessment (measurement). Describe comparability of assessment methods if there is more than one group                                                                                                                                                                                                                          |
| Bias                         | 9       | Describe any efforts to address potential sources of bias                                                                                                                                                                                                                                                                                                                                                     |
| Study size                   | 10      | Explain how the study size was arrived at                                                                                                                                                                                                                                                                                                                                                                     |
| Quantitative variables       | 11      | Explain how quantitative variables were handled in the analyses. If applicable, describe which groupings were chosen and why                                                                                                                                                                                                                                                                                  |
| Statistical methods          | 12      | (a) Describe all statistical methods, including those used to control for confounding<br>(b) Describe any methods used to examine subgroups and interactions<br>(c) Explain how missing data were addressed<br>(d) If applicable, describe analytical methods taking account of sampling strategy<br>(e) Describe any sensitivity analyses                                                                    |
| <b>Results</b>               |         |                                                                                                                                                                                                                                                                                                                                                                                                               |
| Participants                 | 13*     | (a) Report numbers of individuals at each stage of study—eg numbers potentially eligible, examined for eligibility, confirmed eligible, included in the study, completing follow-up, and analysed<br>(b) Give reasons for non-participation at each stage<br>(c) Consider use of a flow diagram                                                                                                               |
| Descriptive data             | 14*     | (a) Give characteristics of study participants (eg demographic, clinical, social) and information on exposures and potential confounders<br>(b) Indicate number of participants with missing data for each variable of interest                                                                                                                                                                               |
| Outcome data                 | 15*     | Report numbers of outcome events or summary measures                                                                                                                                                                                                                                                                                                                                                          |
| Main results                 | 16      | (a) Give unadjusted estimates and, if applicable, confounder-adjusted estimates and their precision (eg, 95% confidence interval). Make clear which confounders were adjusted for and why they were included<br>(b) Report category boundaries when continuous variables were categorized<br>(c) If relevant, consider translating estimates of relative risk into absolute risk for a meaningful time period |
| Other analyses               | 17      | Report other analyses done—eg analyses of subgroups and interactions, and sensitivity analyses                                                                                                                                                                                                                                                                                                                |

1  
2  
3  
4  
5  
6  
7  
8  
9  
10  
11  
12  
13  
14  
15  
16  
17  
18  
19  
20  
21  
22  
23  
24  
25  
26  
27  
28  
29  
30  
31  
32  
33  
34  
35  
36  
37  
38  
39  
40  
41  
42  
43  
44  
45  
46  
47  
48  
49  
50  
51  
52  
53  
54  
55  
56  
57  
58  
59  
60

| <b>Discussion</b>        |    |                                                                                                                                                                            |
|--------------------------|----|----------------------------------------------------------------------------------------------------------------------------------------------------------------------------|
| Key results              | 18 | Summarise key results with reference to study objectives                                                                                                                   |
| Limitations              | 19 | Discuss limitations of the study, taking into account sources of potential bias or imprecision. Discuss both direction and magnitude of any potential bias                 |
| Interpretation           | 20 | Give a cautious overall interpretation of results considering objectives, limitations, multiplicity of analyses, results from similar studies, and other relevant evidence |
| Generalisability         | 21 | Discuss the generalisability (external validity) of the study results                                                                                                      |
| <b>Other information</b> |    |                                                                                                                                                                            |
| Funding                  | 22 | Give the source of funding and the role of the funders for the present study and, if applicable, for the original study on which the present article is based              |

\*Give information separately for exposed and unexposed groups.

**Note:** An Explanation and Elaboration article discusses each checklist item and gives methodological background and published examples of transparent reporting. The STROBE checklist is best used in conjunction with this article (freely available on the Web sites of PLoS Medicine at <http://www.plosmedicine.org/>, Annals of Internal Medicine at <http://www.annals.org/>, and Epidemiology at <http://www.epidem.com/>). Information on the STROBE Initiative is available at [www.strobe-statement.org](http://www.strobe-statement.org).

# BMJ Open

## Is enrolment in the National Health Insurance Scheme in Ghana pro-poor? Evidence from the Ghana Living Standard Survey

|                                 |                                                                                                                                                                                                                                                                                                    |
|---------------------------------|----------------------------------------------------------------------------------------------------------------------------------------------------------------------------------------------------------------------------------------------------------------------------------------------------|
| Journal:                        | <i>BMJ Open</i>                                                                                                                                                                                                                                                                                    |
| Manuscript ID                   | bmjopen-2019-029419.R2                                                                                                                                                                                                                                                                             |
| Article Type:                   | Research                                                                                                                                                                                                                                                                                           |
| Date Submitted by the Author:   | 03-Jun-2019                                                                                                                                                                                                                                                                                        |
| Complete List of Authors:       | Nsiah-Boateng, Eric ; University of Ghana School of Public Health, Prah Ruger, Jennifer; University of Pennsylvania, School of Social Policy & Practice and Perelman School of Medicine<br>Nonvignon, Justice; University of Ghana School of Public Health, Health Policy, Planning and Management |
| <b>Primary Subject Heading</b>: | Health policy                                                                                                                                                                                                                                                                                      |
| Secondary Subject Heading:      | Public health                                                                                                                                                                                                                                                                                      |
| Keywords:                       | Enrolment, Equity, National Health Insurance Scheme, Ghana                                                                                                                                                                                                                                         |
|                                 |                                                                                                                                                                                                                                                                                                    |

SCHOLARONE™  
Manuscripts

## Is enrolment in the National Health Insurance Scheme in Ghana pro-poor? Evidence from the Ghana Living Standard Survey

Eric Nsiah-Boateng<sup>1,2</sup> Jennifer Prah Ruger<sup>3</sup> and Justice Nonvignon<sup>1,4</sup>

<sup>1</sup>School of Public Health, College of Health Sciences, University of Ghana, Accra, Ghana

<sup>2</sup>Research, Policy, Monitoring and Evaluation Directorate, National Health Insurance Authority, Accra, Ghana

<sup>3</sup>School of Social Policy & Practice and Perelman School of Medicine, University of Pennsylvania, Pennsylvania, USA

<sup>4</sup>Health Economics, Systems and Policy Research Group, University of Ghana, Legon

Corresponding author: Eric Nsiah-Boateng

[ensiah-boateng@st.ug.edu.gh](mailto:ensiah-boateng@st.ug.edu.gh)

### ABSTRACT

**Objectives** This article examines equity in enrolment in the Ghana National Health Insurance Scheme (NHIS) to inform policy decisions on progress towards realisation of universal health coverage (UHC).

**Design** Secondary analysis of data from the sixth round of the Ghana Living Standards Survey (GLSS 6).

**Setting** Household-based

**Participants:** A total of 16,774 household heads participated in the GLSS 6, which was conducted between 18 October 2012 and 17 October 2013.

**Analysis** Equity in enrolment was assessed using concentration curves and bivariate and multivariate analyses to determine associated factors.

**Main outcome measure** Equity in NHIS enrolment

**Results** Survey participants had a mean age of 46 years and mean household size of four persons. About 71% of households interviewed had at least one person enrolled in the NHIS. Households in the poorest wealth quintile (73%) had enrolled significantly ( $p<0.001$ ) more than those in the richest quintile (67%). The concentration curves further showed that enrolment was slightly disproportionately concentrated among poor households, particularly those headed by males. However, multivariate logistic analyses showed that the likelihood of NHIS enrolment increased from poorer to richest quintile, low to high level of education, and young adults to older adults. Other factors including sex, household size, household setting, and geographic region were significantly associated with enrolment.

**Conclusions** From 2012–2013 enrolment in the NHIS was higher among poor households, particularly male-headed households, although multivariate analyses demonstrated that the likelihood of NHIS enrolment increased from poorer to richest quintile and from low to high level of education. Policy makers need to ensure equity within and across gender as they strive to achieve UHC.

**Strengths and limitations of this study**

- Our study is the first to use data from the Ghana Living Standards Survey (GLSS) to examine equity in enrolment in the National Health Insurance Scheme (NHIS).
- We developed concentration curves and multivariate logistic regression models to produce new findings to inform decision-making.
- Unlike previous studies, this study found that enrolment in the NHIS is slightly concentrated among the poor; however, the odds of enrolling increases with wealth quintile, level of education, and age.
- As a secondary analysis, the data used for the study lack a number of important factors including trust in scheme management, perceived quality of care, ease of enrolment, etc., which would be useful for better understanding NHIS enrolment.

peer review only



## Introduction

Many low and middle income countries are increasingly implementing prepayment schemes to provide financial risk protection and equitable access to healthcare services for their populations, particularly the poor. (1–3) Prepayment schemes such as social health insurance, if implemented effectively, can reduce out-of-pocket payments (OOP) and associated catastrophic effects on households. (4) The quest to ensure equity in access to healthcare services and to achieve Universal Health Coverage (UHC) has become more imperative, following adoption of the Sustainable Development Goals (SDGs) by member countries of the United Nations (UN). Equity in prepayment schemes is also recognised by World Health Organisation (WHO) as one of the fundamental elements of UHC. (5)

Ghana had a free healthcare system after independence in the 1950s, financed by general taxation. However, this system of healthcare changed when the economy started declining and user fees were partially introduced in the 1970s and 1980s to offset costs of healthcare services delivery. (6–8) Although the OOP somewhat helped public healthcare services providers to recover partial costs of essential medicines and other pharmaceutical products and to raise revenue, the system created inequity in access to healthcare and in some cases led to avoidable deaths. (6,8,9) This situation resulted in the introduction of a National Health Insurance Scheme (NHIS) in 2003 to replace OOP and ensure equity in healthcare access. (10) The NHIS is managed by the National Health Insurance Authority (NHIA), a body mandated by law to regulate both public and private health insurance schemes in the country (11).

Membership in the NHIS is broadly categorised into exempt and non-exempt groups. (11) The exempt groups are members who are exempted from paying premiums to the scheme and they include persons below 18 years old, persons aged 70 years and above, pregnant women, indigent (extreme poor), formal sector workers who contribute to Social Security and National Insurance Trust (SSNIT), and beneficiaries of the Livelihood Empowerment Against Poverty (LEAP) programme. The non-exempt group includes members who pay premiums and enrolment processing fees to the scheme and these are workers in the informal sector of the economy. The NHIS is tax-funded through the National Health Insurance Fund (NHIF) which is based on 2.5% levy on selected goods and services. Other sources of funding are a 2.5% deduction from formal sector workers' SSNIT contributions, premiums from informal sector workers, funds allocated by Parliament, interest from investments, and donor funds and gifts. (11) The premium and enrolment processing fee from the non-exempt group is GHS30.00 (US\$6.33) per year. However, the exempt group only pays a processing fee of GHS8.00 (US\$1.69) for new enrolment and GHS5.00 (US\$1.05) for renewal of membership per year. Relative to the per capital income of GHS8,863 (US\$2,035) (12), the NHIS premium and processing fee represent 0.34%. Again, reference to the daily minimum wage of GHS10.65 (US\$2.25) (13) or GHS2,769.00 (US\$584.18) per year, the NHIS premium and processing fee constitute 0.38%.

Like many health systems around the globe, Ghana's health system is hierarchical with the Ministry of Health (MoH) as apex body mandated to formulate policies to improve health of the population. (14) The MoH has about 12 agencies, comprising of the public, quasi-government and private health facilities, as well health education institutions. The biggest agency is the Ghana Health Service, which is charged with the responsibility of delivering

1  
2  
3 healthcare to the population, as well as implementing policies of the MoH. The Ghana Health  
4 Service has a decentralised system of healthcare delivery with a considerable number of  
5 healthcare facilities located across the country. The lowest level of the healthcare delivery  
6 system is the community-based and health planning services (CHPS) compound and the  
7 highest being the tertiary or teaching hospitals at the national level. The number of healthcare  
8 facilities and professionals are unevenly distributed across the country, with the majority  
9 located in the urban areas. (15,16) On the other hand, many of the private healthcare facilities  
10 particularly the faith-based ones are located in remote areas, where they provide about 40%  
11 of healthcare services to the population. (14)  
12  
13  
14

15 Evidence shows that the NHIS has made progress in population coverage and contributed to  
16 utilization of healthcare services and to expansion of healthcare facilities in its short period  
17 of existence. (17) A report of the NHIS shows that the scheme has covered 36% (10.8 million)  
18 of the population as of December 2018 (18). It has 166 district offices and a network of over  
19 4000 healthcare providers comprising both public and private healthcare facilities across the  
20 country. The benefits package reportedly covers 95% of the disease conditions afflicting the  
21 population. It broadly covers outpatient services, inpatient services, oral health, eye care  
22 services, maternity care and emergencies.(19) Preventive services, for example,  
23 immunization and service that have the potential to pose sustainability challenges are  
24 excluded from the benefit package. (9,11)  
25  
26  
27  
28

29 There are few equity-oriented studies of the NHIS in Ghana. A mixed-method study that  
30 evaluated equity in NHIS enrolment in two regions (Central and Eastern) found that more  
31 males had registered in the scheme than females and households in the richest quintile were  
32 significantly more likely to enrol than those in the poorest quintile. (1) The study also found  
33 that old age, higher education, female-headed households, and perceived NHIS benefits were  
34 significantly associated with NHIS enrolment. Another mixed-method study examining why  
35 the NHIS is not reaching the poor used the same two regions and found fewer of the poor to  
36 be covered due to poverty and policy makers' and implementers' lack of commitment to  
37 pursue NHIS's equity goal. (20) Kusi et al., (21) in examining affordability of NHIS  
38 contribution, used three districts from the southern, middle and northern ecological zones of  
39 Ghana and also found that significantly more of the rich were enrolled in the NHIS than the  
40 poor. These three studies were conducted in 2008 and 2011 and employed bivariate and  
41 logistic regression analyses to examine enrolment equity. Other studies that also examined  
42 equity in NHIS enrolment, using data from the 2008 Ghana Demographic Health Survey  
43 (GDHS), employed concentration curves and logistic regression and found that coverage was  
44 highest among the educated, households in the richest quintile, and urban residents. (22,23)  
45  
46  
47  
48  
49

50 This study examines equity in enrolment in Ghana's NHIS to inform policy decisions regarding  
51 attainment of UHC. It is necessary now to study equity to assess major NHIS policy reforms  
52 instituted in recent years to make the scheme more attractive to the general public. One such  
53 policy is the intersectoral collaboration with state-owned social protection institutions, for  
54 example, Ministry of Gender and Social Protection, Ministry of Education, LEAP Secretariat,  
55 and Savannah Accelerated Development Authority (SADA), to increase the population of the  
56 poor and vulnerable in the NHIS and to improve equity. Findings from this study can inform  
57 policy making on UHC attainment and contribute to the body of knowledge on equity in NHIS  
58 enrolment and progress towards achieving the SDGs.  
59  
60

## Methods

### Study design and setting

This study analyses secondary data from the sixth round of the Ghana Living Standards Survey conducted between 18 October 2012 and 17 October 2013. The survey covered a representative sample of 18,000 households in 1,200 enumeration areas across the 10 administrative regions of the country. (24) Survey participants had an average age of 44 years and 48 years for male and females, respectively. In the 2010 Population and Housing Census (PHC), Ghana had a population of 24,658,823, with 51.2% being females. The majority of the population resided in the Ashanti (19.4%) and Greater Accra (16.3%) regions, the two most urbanised regions (25) of the country. These two regions also have the lowest poverty rates, whilst those in the northern savannah ecological zones (Northern, Upper East, Upper West, Brong-Ahafo, Volta) have the highest poverty rates. (26) Appendices 1 and 2 provide more details on the population distribution and poverty profile of Ghana.

### Data collection and analysis

Data were sourced from the Ghana Statistical Service (GSS) and had already been cleaned and managed including creation of sampling weights and wealth quintiles. The GSS constructed the wealth quintiles using household expenditure as a proxy (24). The household expenditure is composed of food and non-food items. The total number of households covered in the survey was divided into five groups by their total household consumption expenditure. The quintile ranking was then constructed using the household members total expenditure per capital. Bivariate analyses examined unadjusted relationships between socio-demographic factors and wealth quintiles. Equity in enrolment was assessed using concentration curves and indices, and multivariate logistic regression models to determine factors associated with enrolment. (1,22,27,28) Whilst the concentration curve analyses equity in NHIS enrolment between the poor and the rich, the logistic regression model shows factors associated with enrolment in the scheme. The use of these two analytical techniques is therefore meant to produce reliable findings for informed policy decision-making.

The unit of analysis was the household and we examined cumulative proportion of enrolment by wealth quintiles, decomposed by sex, within and across male-headed and female-headed households. A multivariate logistic regression model was employed to assess whether lower wealth groups were more likely to enrol in the NHIS than higher wealth groups, holding the other socio-demographic variables constant. The outcome or dependent variable 'NHIS enrolment status' was labelled 1 for active card-bearing members and 0 for inactive card-bearing members or those who had never enrolled in the scheme. The main independent variable was 'wealth quintile' and the others (control variables) were socio-demographic characteristics such as age of household head, sex of household head, household size, education level of household head, household head employment status, household setting, and geographic region of residence. Age of household head was categorised based on the Medical Subject Headings (MeSH) age defining. (29,30) Microsoft Excel 2016 and STATA version 13 were used for all analyses.

### Patient and public involvement

Patients were not involved in this study.

## Results

### Characteristics of study participants

A total of 16,772 household heads with an average age of 46 years ( $SD=15.58$ ) and household size of 4 persons ( $SD=2.78$ ) responded to questions on NHIS in the survey (Table 1). Majority of the household heads (47%) were in the age bracket of 25-44 years. Out of the total number of survey participants, 72% were females; 51% had no formal education; 90% were employed; 24% were in the richest quintile; 56% lived in urban areas; and 12% resided in the Ashanti region. About 71% of households had at least one person enrolled in the NHIS.

### Equity in enrolment

Results of the concentration curve analyses demonstrate that enrolment was slightly more concentrated among poor households (Figure 1). Enrolment by sex also showed that enrolment was more concentrated among households headed by males compared to those headed by females. The concentration indices further revealed that among the study participants, equity was more pronounced in the insured than the uninsured and within male-headed households than female-headed households (Table 2).

### Relationship between household characteristics and wealth quintiles

There were significant differences in all household characteristics by wealth quintiles, except employment status (Table 3). The poorest households (73%) enrolled in the NHIS more than the richest households (67%). Interestingly, the richer households had the second highest enrolment (72.4%) in the scheme. Majority of the poorest households (80.1%) had no formal education compared to about 25% of the richest households with tertiary level education. Similarly, majority of the poorest households (91%) were more employed as were the richest households (89%), and there were more females (79%) in the poorest quintile than in the richest quintile (67%). There were also significantly more household heads aged 45 years or more in the poorest quintile than those in the richest quintile, and more households in the poorest quintile (86%) living in urban settings than households in the richest quintiles (30%).

Results of the multivariate logistic regression showed that the likelihood of enrolling in the NHIS increases from poorer to richest quintile, low to high level of education, and young adults to older adults (Table 4). Females (OR: 1.52; 95% CI: 1.39–1.65) and persons living in the Upper East (OR: 5.99; 95% CI: 4.91–7.31), Upper West (OR: 5.04; 95% CI: 4.14–6.15), Brong-Ahafo (OR: 3.06; 95% CI: 2.58–3.62), Volta (OR: 2.04; 95% CI: 1.74–2.39), and Northern (OR: 1.32; 95% CI: 1.13–1.54) regions were significantly more likely to enrol in the NHIS than their respective reference categories. Surprisingly, the employed were less likely to enrol in the NHIS (OR=0.99; 95% CI 0.87–1.12) although not significantly so. The unadjusted odds ratios (OR) showed similar associations except for wealth quintile, the explanatory variable of interest, which showed a decreased likelihood of enrolling in the NHIS from poorer to richest.

## Discussion

This study examined equity in NHIS enrolment employing data from the Ghana Living Standards Survey (round 6), which was conducted between October 2012 and October 2013. The findings show inequity in enrolment and significant associations between socio-demographic factors and NHIS enrolment. Among households surveyed, enrolment is disproportionately concentrated among poor households especially those headed by males. The possible explanation relates to policy changes made over the last few years to increase

1  
2  
3 enrolment in the scheme. One such policy is the deliberate attempt to increase numbers of  
4 the poor and vulnerable in the scheme through enrolment of the Livelihood Empowerment  
5 Against Poverty (LEAP) beneficiaries, students in secondary and tertiary institutions in Ghana,  
6 prisoners, and individuals living in less developed geographic regions, particularly those in the  
7 northern savannah ecological zone, where there is high prevalence of poverty. The  
8 disproportionate concentration of enrolment among poor households contradicts previous  
9 studies on the NHIS, (1,20–22,31,32) due possibly to the years in which those studies were  
10 conducted (2008 and 2011), as well as the limited regional scope (three administrative  
11 regions except the 2008 Demographic Health Survey that covered the entire country). This  
12 present study employs a nationally representative survey.  
13  
14  
15

16  
17 Our study also shows that a number of socio-demographic factors are significantly associated  
18 with NHIS enrolment. Although unadjusted findings illustrate that enrolment is concentrated  
19 among poor households, multivariate findings illustrate that the odds of enrolling in the  
20 scheme increases with wealth quintiles, that is, the rich are more likely to enrol than the poor.  
21 This may be attributed to evidence that the rich are more able to afford the cost of enrolling  
22 in the health insurance programme than the poor. (1,20,33,34) Besides, as explained earlier,  
23 the policy decision to deliberately enrol the poor might have contributed to their higher  
24 numbers in the NHIS, but voluntarily other factors other than being poor contribute to  
25 enrolment in the scheme. Individuals with higher levels of education are more likely to enrol  
26 in the NHIS compared to those with no formal education; females are more likely to enrol  
27 than males; and older adults are more likely to enrol than young adults, consistent with  
28 previous studies. (1,22,32–35) The employed are less likely to enrol compared to the  
29 unemployed. The plausible explanation is that the employed may be able to afford OOP for  
30 healthcare services because they are more economically resourced than the unemployed.  
31 This result runs counter to earlier studies. (21,35)  
32  
33  
34  
35

36 Findings from this study also reveal that individuals residing in rural settings are significantly  
37 less likely to enrol in the NHIS compared to those living in urban areas, consistent with  
38 previous studies, (32,35) but contradicting a study by Jehu-Appiah et al, (1) One reason may  
39 be due to poverty; prior studies showed that the majority of rural dwellers are unable to  
40 afford the NHIS premium and processing or renewal fee. (20,31,34,36–38) This study's  
41 findings also show that the odds of enrolling in the NHIS increases with household size,  
42 consistent with other studies, (22,33,34) because larger households may be risk averse and  
43 thus would enrol in the NHIS to seek financial risk protection against their healthcare costs  
44 and to avoid catastrophic OOP. Our findings also reveal that individuals residing in less  
45 developed regions of the country are significantly more likely to enrol in the scheme  
46 compared to those in developed regions. Again, this may be attributed to policy reforms  
47 focused on enrolling individuals living in deprived regions, particularly those in the northern  
48 savannah ecological zones, comprising the Northern, Upper East, Upper West, and some parts  
49 of Brong-Ahafo and Volta regions, (24) consistent with some studies (22,23) and  
50 contradicting other. (35)  
51  
52  
53  
54  
55

56 Our study's primary limitation is that the data lacked several important factors (such as trust  
57 in scheme management, perceived quality of care, ease of enrolment, etc.), which would be  
58 useful for better understanding NHIS enrolment. Nonetheless, the variables used in the  
59 multivariate logistic regression modelling did not significantly affect model robustness.  
60

## Conclusion

The study reveals that from 2012–2013, enrolment in the NHIS was higher among poor households, particularly male-headed households, although the multivariate analyses demonstrated that the likelihood of NHIS enrolment increased from poorer to richest quintile, low to high level of education and young adults to older adults. Whilst the NHIS strives to achieve its pro-poor goal of providing financial risk protection for the poor and vulnerable in society, equity must be addressed within and across the entire population. Adequate funds are also required to cover the anticipated increase in medical claims costs because as more poor and vulnerable groups enrol in the scheme, the claims cost is likely to escalate and threaten the scheme's sustainability. Thus, policy decisions to ensure equity in enrolment must also ensure commensurate funding to avoid financial uncertainty and collapse. Further research on equity in healthcare services utilization, expenditures, and accreditation of healthcare providers is needed to provide a fuller picture of equity assessment in the NHIS.

## Ethics approval

This study is a secondary analysis of the Ghana Living Standard Survey (round 6) data, however formal approval was obtained from the Ghana Statistical Service to use the data.

## Funding

None

## Competing interests

ENB is an employee of the National Health Insurance Authority, however his affiliation did not influence findings of this study. JPR and JN declare no competing interests.

## Contributors

ENB, JPR and JN conceived and designed the study. JN retrieved the data and ENB analysed the data and drafted the manuscript. JPR and JN provided intellectual contributions to develop and revise the manuscript. All the authors read and approved the manuscript for publication.

## Patient consent

Not applicable

## Data sharing statement

No additional data available

## Acknowledgements

We are grateful to the Ghana Statistical Service for the provision of the GLSS data for this study. We also thank all contributors and reviewers for their comments and time.

## Reference

1. Jehu-Appiah C, Aryeetey G, Spaan E, de Hoop T, Agyepong I, Baltussen R. Equity aspects of the National Health Insurance Scheme in Ghana: Who is enrolling, who is not and why? *Soc Sci Med*. 2011;72(2):157–65.
2. Wiseman V, Thabrany H, Asante A, Haemmerli M, Kosen S, Gilson L, et al. An evaluation of health systems equity in Indonesia: study protocol. *Int J Equity Health*. 2018;(17):1–9.
3. Asante A, Price J, Hayen A, Jan S, Wiseman V. Equity in Health Care Financing in Low- and Middle-Income Countries : A Systematic Review of Evidence from Studies Using Benefit and Financing Incidence Analyses. *PLoS One*. 2016;11(4):1–20.
4. Ruger JP. An Alternative Framework for Analyzing Financial Protection in Health. *PLoS Med*. 2012;9(8):e1001294.
5. WHO. Health systems financing: the path to universal coverage. *World Heal Rep*. 2010;1–128.
6. Waddington C, Enyimayew KA. A price to pay, part 2: The impact of user charges in the Volta region of Ghana. *Int J Health Plann Manage*. 1990;5(4):287–312.
7. Asenso-Okyere WK, Anum A, Osei-Akoto I, Adukonu A. Cost recovery in Ghana: are there any changes in health care seeking behaviour? *Health Policy Plan*. 1998 Jun;13(2):181–8.
8. Nyonator F, Kutzin J. Health for some? The effects of user fees in the Volta Region of Ghana. *Health Policy Plan*. 1999;14(4):329–41.
9. Ministry of Health. National Health Insurance Policy framework for Ghana: Revised Version. Accra; 2004 [https://www.ghanahealthservice.org/downloads/NHI\\_policy\\_framework.pdf](https://www.ghanahealthservice.org/downloads/NHI_policy_framework.pdf). Accessed: 17 Dec 2017.
10. Parliament of Ghana. National Health Insurance Act, 2003 (Act 650). Insurance Act, 650 Accra, Ghana; 2003 p. 1–39.
11. Parliament of Ghana. National Health Insurance Act, 2012 (Act 852). Accra, Ghana: Parliament of Ghana; 2012 p. 1–55.
12. Attah Yeboah O. Per capita GDP increases to US\$2,035 after rebasing ...but has little effect on poverty. *Business and Financial Times Online*. 2018 . Accessed 8 Apr 2019. <https://thebftonline.com/2018/economy/per-capita-gdp-increases-to-us2035-after-rebasing-but-has-little-effect-on-poverty/>
13. Nyavor G. Minimum wage goes up by 10%; now GHS10.65. *Myjoyonline.com*. 2018 <https://www.myjoyonline.com/business/2018/July-27th/minimum-wage-goes-up-by-now-gh1065.php>. Accessed 8 Apr 2019.
14. Aseweh Abor P, Abekah-Nkrumah G, Abor J. An examination of hospital governance in Ghana. *Leadersh Heal Serv*. 2008;21(1):47–60.
15. Andoh-Adjei F-X, Nsiah-boateng E, Asante FA, Spaan E, Velden K Van Der. Perception of quality health care delivery under capitation payment : a cross-sectional survey of health insurance subscribers and providers in Ghana. *BMC Fam Pract*. 2018;19(37):1–12.
16. Duku SKO, Nketiah-Amponsah E, Janssens W, Pradhan M. Perceptions of healthcare quality in Ghana: Does health insurance status matter? *PLoS One*. 2018;13(1):1–17.

17. National Development Planning Commission. 2008 Citizens' assessment of the national health insurance scheme: towards a sustainable health care financing arrangement that protects the poor. Accra; 2009.
18. National Health Insurance Authority. Active membership report for December 2018 (final as at April 1 2019). Accra; 2019.
19. National Health Insurance Authority. Benefits Package. National Health Insurance Scheme. 2019. <http://www.nhis.gov.gh/benefits.aspx> . Accessed 8 Apr 2019.
20. Kotoh AM, Van Der Geest S. Why are the poor less covered in Ghana's national health insurance? A critical analysis of policy and practice. *Int J Equity Health*. 2016;15(34):1–11.
21. Kusi A, Enemark U, Hansen KS, Asante FA. Refusal to enrol in Ghana ' s National Health Insurance Scheme : is affordability the problem ? *Int J Equity Health*. 2015;14(2):1–14.
22. Dake FAA. Examining equity in health insurance coverage : an analysis of Ghana ' s National Health Insurance Scheme. *Int J Equity Health*. 2018;17(85):1–10.
23. Dixon J, Tenkorang EY, Luginaah I. Ghana's National Health Insurance Scheme: Helping the Poor or Leaving Them Behind? *Environ Plan C Gov Policy*. 2011 Dec;29(6):1102–15.
24. Ghana Statistical Service. Ghana Living Standards Survey Round 6 (GLSS 6): Main Report. Accra; 2014. [http://www.statsghana.gov.gh/docfiles/glss6/GLSS6\\_Main\\_Report.pdf](http://www.statsghana.gov.gh/docfiles/glss6/GLSS6_Main_Report.pdf). Accessed 21 Aug 2017.
25. Ghana Statistical Service. 2010 Population & housing census: summary report of final results. Accra; 2012. [http://statsghana.gov.gh/docfiles/2010phc/Census2010\\_Summary\\_report\\_of\\_final\\_results.pdf](http://statsghana.gov.gh/docfiles/2010phc/Census2010_Summary_report_of_final_results.pdf). Accessed 21 Aug 2017.
26. Ghana Statistical Service. Ghana Living Standards Survey Round 6 (GLSS 6): Poverty Profile in Ghana (2005-2013). Accra; 2014. [http://www.statsghana.gov.gh/docfiles/glss6/GLSS6\\_Poverty\\_Profile\\_in\\_Ghana.pdf](http://www.statsghana.gov.gh/docfiles/glss6/GLSS6_Poverty_Profile_in_Ghana.pdf). Accessed 29 Jan 2017.
27. Allin S, Masseria C, Sorenson C, Papanicolas I, Mossialos E. Measuring inequalities in access to health care. A review of the indices. *London Sch Econ Polit Sci*. 2007;(June):1–24.
28. O'Donnell O, Van Doorslaer DE, Wagstaff A, Lindelow M. *Analyzing Health Equity Using Household Survey Data: A Guide to Techniques and Their Implementation*. Washington DC: The World Bank; 2008. [www.worldbank.org](http://www.worldbank.org). Accessed 22 Sep 2018.
29. Geifman N, Cohen R, Rubin E. Redefining meaningful age groups in the context of disease. *Age (Dordr)*. 2013 Dec;35(6):2357–66.
30. Kastner M, Wilczynski NL, Walker-Dilks C, McKibbin KA, Haynes B. Age-specific search strategies for Medline. *J Med Internet Res*. 2006 Oct 25;8(4):e25.
31. Kotoh AM, Aryeetey GC, Van Der Geest S. Factors That Influence Enrolment and Retention in Ghana' National Health Insurance Scheme. *Int J Heal Policy Manag Int J Heal Policy Manag*. 2018;7(5):443–54.
32. Akazili J, Welaga P, Bawah A, Achana FS, Oduro A, Awoonor-Williams JK, et al. Is Ghana's pro-poor health insurance scheme really for the poor? Evidence from Northern Ghana. *BMC Health Serv Res*. 2014;14(637):1–9.
33. Dror DM, Hossain SAS, Majumdar A, Pérez Koehlmoos TL, John D, Panda PK. What Factors Affect Voluntary Uptake of Community-Based Health Insurance Schemes in



- 1  
2  
3 Low- and Middle-Income Countries? A Systematic Review and Meta-Analysis. PLoS  
4 One. 2016;11(8):1–31.  
5  
6 34. Adebayo EF, Uthman OA, Wiysonge CS, Stern EA, Lamont KT, Ataguba JE. A  
7 systematic review of factors that affect uptake of community-based health insurance  
8 in low-income and middle- income countries. BMC Health Serv Res. 2015;15(543):1–  
9 13.  
10  
11 35. van der Wielen N, Falkingham J, Channon AA. Determinants of National Health  
12 Insurance enrolment in Ghana across the life course: Are the results consistent  
13 between surveys? Int J Equity Health. 2018;17(49):1–14.  
14  
15 36. Fenny AP, Kusi A, Arhinful DK, Asante FA. Factors contributing to low uptake and  
16 renewal of health insurance: a qualitative study in Ghana. Glob Heal Res Policy.  
17 2016;1(18):1–10.  
18  
19 37. Agyepong IA, Nana D, Abankwah Y, Abroso A, Chun C, Nii J, et al. The “Universal” in  
20 UHC and Ghana’s National Health Insurance Scheme: policy and implementation  
21 challenges and dilemmas of a lower middle income country. BMC Health Serv Res.  
22 2016;16(504):1–14.  
23  
24 38. Atinga RA, Abihiro GA, Kuganab-Lem RB. Factors influencing the decision to drop out of  
25 health insurance enrolment among urban slum dwellers in Ghana. Trop Med Int Heal.  
26 2015;20(3):312–21.  
27  
28  
29

30  
31 **Table 1:** Individual and household characteristics

| Variable                     | % (n=16,772) |
|------------------------------|--------------|
| <b>NHIS status</b>           |              |
| Covered                      | 70.5         |
| Not covered                  | 29.5         |
| <b>Highest Education</b>     |              |
| None                         | 50.7         |
| Primary                      | 30.5         |
| Secondary                    | 8.5          |
| Tertiary                     | 10.3         |
| <b>Employment status</b>     |              |
| Employed                     | 89.5         |
| Unemployed                   | 10.5         |
| <b>Wealth quintile</b>       |              |
| Poorest                      | 20.1         |
| Poorer                       | 17.6         |
| Middle                       | 17.9         |
| Richer                       | 20.1         |
| Richest                      | 24.3         |
| <b>Sex of household head</b> |              |
| Female                       | 71.8         |
| Male                         | 28.2         |
| <b>Age of household head</b> |              |
| 19–24                        | 4.9          |
| 25–44                        | 47.1         |

|                              |            |
|------------------------------|------------|
| <b>45–64</b>                 | 33.3       |
| <b>65–79</b>                 | 11.7       |
| <b>80+</b>                   | 3.0        |
| <b>Household size, M(SD)</b> | 4.3 (2.78) |
| <b>Household setting</b>     |            |
| Rural                        | 44.4       |
| Urban                        | 55.6       |
| <b>Geographic region</b>     |            |
| Western                      | 10.2       |
| Central                      | 9.6        |
| Greater Accra                | 11.5       |
| Volta                        | 9.4        |
| Eastern                      | 10.8       |
| Ashanti                      | 11.8       |
| Brong Ahafo                  | 9.7        |
| Northern                     | 10.2       |
| Upper East                   | 8.6        |
| Upper West                   | 8.3        |

M: mean; SD: standard deviation

**Table 2:** Concentration index (CI) showing inequity in NHIS enrolment

| Wealth quintile | Total          |               | Within households (HH) |               |                |               | Between households (HH) |                |
|-----------------|----------------|---------------|------------------------|---------------|----------------|---------------|-------------------------|----------------|
|                 | Enrolled       | Not enrolled  | Female-headed HH       |               | Male-headed HH |               | Female                  | Male           |
|                 |                |               | Enrolled               | Not enrolled  | Enrolled       | Not enrolled  |                         |                |
| Poorest         | -0.0009        | 0.0021        | -0.0023                | 0.0060        | -0.0009        | 0.0020        | 0.0073                  | -0.0029        |
| Poorer          | -0.0014        | 0.0035        | 0.0061                 | -0.0153       | -0.0010        | 0.0026        | 0.0096                  | -0.0039        |
| Middle          | 0.0018         | -0.0039       | -0.0085                | 0.0234        | -0.0002        | 0.0011        | 0.0268                  | -0.0108        |
| Richer          | -0.0116        | 0.0290        | 0.0000                 | 0.0000        | -0.0135        | 0.0321        | 0.0455                  | -0.0185        |
| Richest         | 0.0000         | 0.0000        | -0.0056                | 0.0167        | 0.0000         | 0.0000        | 0.0000                  | 0.0000         |
| <b>Total</b>    | <b>-0.0120</b> | <b>0.0307</b> | <b>-0.0103</b>         | <b>0.0307</b> | <b>-0.0156</b> | <b>0.0378</b> | <b>0.0891</b>           | <b>-0.0362</b> |

**Table 3:** Differences in household characteristics by wealth quintile (n=16,772)

| Variable                 | Q1 (Poorest) | Q2 (Poorer) | Q3 (Middle) | Q4 (Richer) | Q5 (Richest) | Total | Pearson's $\chi^2$ |
|--------------------------|--------------|-------------|-------------|-------------|--------------|-------|--------------------|
| <b>NHIS status</b>       |              |             |             |             |              |       | 0.000              |
| Enrolled                 | 72.6         | 70.9        | 70.3        | 72.4        | 67.0         | 70.5  |                    |
| Not enrolled             | 27.4         | 29.1        | 29.7        | 27.6        | 33.0         | 29.5  |                    |
| <b>Highest education</b> |              |             |             |             |              |       | 0.000              |
| None                     | 80.1         | 62.7        | 51.9        | 39.8        | 25.8         | 50.7  |                    |
| Primary                  | 16.3         | 28.7        | 34.8        | 38.7        | 33.6         | 30.5  |                    |
| Secondary                | 2.1          | 5.4         | 7.0         | 10.1        | 15.8         | 8.5   |                    |
| Tertiary                 | 1.5          | 3.2         | 6.3         | 11.4        | 24.8         | 10.3  |                    |
| <b>Employment status</b> |              |             |             |             |              |       | 0.065              |
| Employed                 | 90.9         | 89.6        | 90.5        | 88.7        | 88.8         | 89.5  |                    |
| Unemployed               | 9.1          | 10.4        | 9.5         | 11.3        | 11.2         | 10.5  |                    |
| <b>Sex</b>               |              |             |             |             |              |       | 0.000              |

|                              |      |      |      |      |      |       |       |
|------------------------------|------|------|------|------|------|-------|-------|
| Female                       | 79.1 | 73.1 | 71.7 | 69.4 | 66.9 | 71.8  |       |
| Male                         | 20.9 | 26.9 | 28.3 | 30.6 | 33.1 | 28.2  |       |
| <b>Age of household head</b> |      |      |      |      |      |       | 0.000 |
| 19–24                        | 2.4  | 4.1  | 4.4  | 5.9  | 7.0  | 4.9   |       |
| 25–44                        | 40.9 | 43.8 | 46.6 | 48.4 | 54.1 | 47.1  |       |
| 45–64                        | 37.5 | 35.0 | 34.7 | 32.0 | 28.7 | 33.3  |       |
| 65–79                        | 14.9 | 14.2 | 11.4 | 10.9 | 7.9  | 11.7  |       |
| 80+                          | 4.3  | 2.9  | 2.9  | 2.8  | 2.3  | 3.0   |       |
| <b>Household size</b>        | 20.1 | 17.7 | 17.9 | 20.1 | 24.3 | 100.0 | 0.000 |
| <b>Household setting</b>     |      |      |      |      |      |       | 0.000 |
| Rural                        | 13.7 | 31.1 | 43.6 | 56.0 | 70.4 | 44.4  |       |
| Urban                        | 86.3 | 68.9 | 56.4 | 44.0 | 29.6 | 55.6  |       |
| <b>Geographic region</b>     |      |      |      |      |      |       | 0.000 |
| Western                      | 5.6  | 9.4  | 11.1 | 12.8 | 11.9 | 10.2  |       |
| Central                      | 5.1  | 10.6 | 12.2 | 10.8 | 9.5  | 9.6   |       |
| Greater Accra                | 2.3  | 4.4  | 8.0  | 14.0 | 24.7 | 11.5  |       |
| Volta                        | 8.7  | 11.0 | 9.8  | 10.1 | 7.9  | 9.4   |       |
| Eastern                      | 7.0  | 11.8 | 13.8 | 13.1 | 8.9  | 10.8  |       |
| Ashanti                      | 4.0  | 9.2  | 11.9 | 14.6 | 17.7 | 11.8  |       |
| Brong-Ahafo                  | 8.4  | 11.9 | 11.0 | 9.6  | 8.2  | 9.7   |       |
| Northern                     | 20.0 | 12.9 | 9.6  | 6.4  | 3.6  | 10.2  |       |
| Upper East                   | 14.7 | 11.4 | 8.3  | 6.2  | 3.8  | 8.6   |       |
| Upper West                   | 24.2 | 7.4  | 4.2  | 2.5  | 3.8  | 8.3   |       |

**Table 4:** Multivariate logistic regression model of enrolling in the NHIS

| Variable                     | Unadjusted OR | [95% C.I.] | Adjusted OR | [95% C.I.] |
|------------------------------|---------------|------------|-------------|------------|
| <b>Wealth quintile</b>       |               |            |             |            |
| Poorest                      | 1.00          |            | 1.00        |            |
| Poorer                       | 0.92          | 0.82–1.02  | 1.33***     | 1.17–1.50  |
| Middle                       | 0.89*         | 0.79–0.99  | 1.54***     | 1.36–1.75  |
| Richer                       | 0.98          | 0.88–1.09  | 1.94***     | 1.70–2.22  |
| Richest                      | 0.76***       | 0.69–0.84  | 1.67***     | 1.45–1.91  |
| <b>Highest education</b>     |               |            |             |            |
| None                         | 1.00          |            | 1.00        |            |
| Primary                      | 1.05          | 0.98–1.14  | 1.65***     | 1.51–1.80  |
| Secondary                    | 1.27***       | 1.12–1.44  | 2.35***     | 2.03–2.72  |
| Tertiary                     | 1.75***       | 1.55–1.99  | 2.87***     | 2.48–3.32  |
| <b>Employment status</b>     |               |            |             |            |
| Unemployed                   | 1.00          |            | 1.00        |            |
| Employed                     | 0.85**        | 0.76–0.95  | 0.99        | 0.87–1.12  |
| <b>Sex of household head</b> |               |            |             |            |
| Male                         | 1.00          |            | 1.00        |            |
| Female                       | 1.11**        | 1.03–1.19  | 1.52***     | 1.39–1.65  |
| <b>Age of household head</b> |               |            |             |            |
| <b>19–24</b>                 | 1.00          |            | 1.00        |            |
| <b>25–44</b>                 | 1.99***       | 1.72–2.31  | 1.53***     | 1.31–1.79  |
| <b>45–64</b>                 | 2.38***       | 2.05–2.77  | 1.69***     | 1.43–1.99  |
| <b>65–79</b>                 | 3.43***       | 2.87–4.08  | 3.05***     | 2.51–3.69  |
| <b>80+</b>                   | 3.18***       | 2.47–4.08  | 3.28***     | 2.49–4.34  |

|                          |         |           |         |           |
|--------------------------|---------|-----------|---------|-----------|
| <b>Household size</b>    | 1.17*** | 1.15–1.18 | 1.23*** | 1.20–1.25 |
| <b>Household setting</b> |         |           |         |           |
| Urban                    | 1.00    |           | 1.00    |           |
| Rural                    | 0.97    | 0.91–1.04 | 0.75*** | 0.69–0.82 |
| <b>Geographic region</b> |         |           |         |           |
| Western                  | 1.00    |           | 1.00    |           |
| Central                  | 0.64*** | 0.55–0.73 | 0.63*** | 0.54–0.73 |
| Greater Accra            | 0.79**  | 0.69–0.90 | 0.63*** | 0.52–0.69 |
| Volta                    | 1.89*** | 1.62–2.21 | 2.04*** | 1.73–2.39 |
| Eastern                  | 1.34*** | 1.16–1.53 | 1.39*** | 1.20–1.62 |
| Ashanti                  | 1.16*   | 1.01–1.32 | 1.08    | 0.94–1.25 |
| Brong-Ahafo              | 2.68*** | 2.27–3.15 | 3.06*** | 2.58–3.62 |
| Northern                 | 1.07    | 0.92–1.22 | 1.32*** | 1.13–1.54 |
| Upper East               | 4.30*** | 3.56–5.19 | 5.99*** | 4.91–7.31 |
| Upper West               | 3.62*** | 3.01–4.33 | 5.04*** | 4.14–6.15 |
| <b>_cons</b>             |         |           | 0.23*** | 0.18–0.29 |
| <b>Number of obs.</b>    | 16,693  |           |         |           |
| <b>LR chi2(24)</b>       | 2236.60 |           |         |           |
| <b>Prob &gt; chi2</b>    | 0.0000  |           |         |           |
| <b>Pseudo R2</b>         | 0.1106  |           |         |           |

OR: odds ratio; \* $p < 0.10$ ; \*\* $p < 0.05$ ; \*\*\* $p < 0.01$ ; \*\*\*\* $p < 0.001$ ; Control variables: education of household head, employment status of household head, sex of household, age of household head, household size, household setting and geographic region

#### Figure legends

Figure 1: Concentration curves for enrolment in NHIS



a: Concentration curves for NHIS enrolment



b: Concentration curves for NHIS enrolment by sex



c: Concentration curves for NHIS enrolment in male-headed households



d: Concentration curves for NHIS enrolment in female-headed households

Figure 1: Concentration curves for enrolment in NHIS

For peer review only - <http://bmjopen.bmj.com/site/about/guidelines.xhtml>

**Appendix 1: Distribution of population by region, sex and locality of enumeration, 2010**

| Region             | Total Population  | Male              | Female            | Locality of enumeration |                   | Share of Population (%) | Proportion urban | Sex Ratio   | Percentage increase over 2000 | Intercensal Growth Rate (%) |
|--------------------|-------------------|-------------------|-------------------|-------------------------|-------------------|-------------------------|------------------|-------------|-------------------------------|-----------------------------|
|                    |                   |                   |                   | Urban                   | Rural             |                         |                  |             |                               |                             |
| <b>All Regions</b> | <b>24,658,823</b> | <b>12,024,845</b> | <b>12,633,978</b> | <b>12,545,229</b>       | <b>12,113,594</b> | <b>100.0</b>            | <b>50.9</b>      | <b>95.2</b> | <b>30.4</b>                   | <b>2.5</b>                  |
| Western            | 2,376,021         | 1,187,774         | 1,188,247         | 1,007,969               | 1,368,052         | 9.6                     | 42.4             | 100.0       | 23.5                          | 2.0                         |
| Central            | 2,201,863         | 1,050,112         | 1,151,751         | 1,037,878               | 1,163,985         | 8.9                     | 47.1             | 91.2        | 38.1                          | 3.1                         |
| Greater Accra      | 4,010,054         | 1,938,225         | 2,071,829         | 3,630,955               | 379,099           | 16.3                    | 90.5             | 93.6        | 38.0                          | 3.1                         |
| Volta              | 2,118,252         | 1,019,398         | 1,098,854         | 713,735                 | 1,404,517         | 8.6                     | 33.7             | 92.8        | 29.5                          | 2.5                         |
| Eastern            | 2,633,154         | 1,290,539         | 1,342,615         | 1,143,918               | 1,489,236         | 10.7                    | 43.4             | 96.1        | 25.0                          | 2.1                         |
| Ashanti            | 4,780,380         | 2,316,052         | 2,464,328         | 2,897,290               | 1,883,090         | 19.4                    | 60.6             | 94.0        | 32.3                          | 2.7                         |
| Brong Ahafo        | 2,310,983         | 1,145,271         | 1,165,712         | 1,028,473               | 1,282,510         | 9.4                     | 44.5             | 98.2        | 27.3                          | 2.3                         |
| Northern           | 2,479,461         | 1,229,887         | 1,249,574         | 750,712                 | 1,728,749         | 10.1                    | 30.3             | 98.4        | 36.2                          | 2.9                         |
| Upper East         | 1,046,545         | 506,405           | 540,140           | 219,646                 | 826,899           | 4.2                     | 21.0             | 93.8        | 13.7                          | 1.2                         |
| Upper West         | 702,110           | 341,182           | 360,928           | 114,653                 | 587,457           | 2.8                     | 16.3             | 94.5        | 21.8                          | 1.9                         |

Source: Adapted from Ghana Statistical Service <sup>18</sup>

**Appendix 2:** Poverty incidence and poverty gap by region (%) 2005/06–2012/13 (Poverty line=GHS1,314=US\$277.22)

| Region           | Poverty incidence (P <sub>0</sub> ) | Contribution to total poverty (C <sub>0</sub> ) | Poverty gap (P <sub>1</sub> ) | Contribution to total poverty gap (C <sub>1</sub> ) | Poverty incidence (P <sub>0</sub> ) | Contribution to total poverty (C <sub>0</sub> ) | Poverty gap (P <sub>1</sub> ) | Contribution to total poverty gap |
|------------------|-------------------------------------|-------------------------------------------------|-------------------------------|-----------------------------------------------------|-------------------------------------|-------------------------------------------------|-------------------------------|-----------------------------------|
| <b>2012/13</b>   |                                     |                                                 |                               |                                                     | <b>2005/06</b>                      |                                                 |                               |                                   |
| Western          | 20.9                                | 7.9                                             | 5.7                           | 6.8                                                 | 22.9                                | 7.3                                             | 5.4                           | 5.0                               |
| Central          | 18.8                                | 6.9                                             | 5.6                           | 6.4                                                 | 23.4                                | 6.4                                             | 5.6                           | 4.4                               |
| Greater Accra    | 5.6                                 | 3.8                                             | 1.6                           | 3.5                                                 | 13.5                                | 5.9                                             | 3.7                           | 4.7                               |
| Volta            | 33.8                                | 12.1                                            | 9.8                           | 11.0                                                | 37.3                                | 8.7                                             | 9.2                           | 6.2                               |
| Eastern          | 21.7                                | 9.3                                             | 5.8                           | 7.8                                                 | 17.8                                | 7.5                                             | 4.2                           | 5.2                               |
| Ashanti          | 14.8                                | 12.0                                            | 3.5                           | 9.0                                                 | 24.0                                | 12.6                                            | 6.4                           | 9.8                               |
| Brong Ahafo      | 27.9                                | 11.4                                            | 7.4                           | 9.4                                                 | 34.0                                | 9.8                                             | 9.5                           | 7.9                               |
| Northern         | 50.4                                | 20.8                                            | 19.3                          | 24.9                                                | 55.7                                | 21.0                                            | 23.0                          | 25.2                              |
| Upper East       | 44.4                                | 7.4                                             | 17.2                          | 9.0                                                 | 72.9                                | 10.9                                            | 35.3                          | 15.3                              |
| Upper West       | 70.7                                | 8.4                                             | 33.2                          | 12.3                                                | 89.1                                | 10.0                                            | 50.7                          | 16.4                              |
| <b>All Ghana</b> | <b>24.2</b>                         | <b>100.0</b>                                    | <b>7.8</b>                    | <b>100.0</b>                                        | <b>31.9</b>                         | <b>100.0</b>                                    | <b>11.0</b>                   | <b>100.0</b>                      |

Source: Adapted from Ghana Statistical Service <sup>19</sup>

STROBE Statement—Checklist of items that should be included in reports of *cross-sectional studies*

|                              | Item No | Recommendation                                                                                                                                                                                                                                                                                                                                                                                                             |
|------------------------------|---------|----------------------------------------------------------------------------------------------------------------------------------------------------------------------------------------------------------------------------------------------------------------------------------------------------------------------------------------------------------------------------------------------------------------------------|
| <b>Title and abstract</b>    | 1       | (a) Indicate the study's design with a commonly used term in the title or the abstract ( <b>Page 1</b> )<br>(b) Provide in the abstract an informative and balanced summary of what was done and what was found ( <b>Page 1</b> )                                                                                                                                                                                          |
| <b>Introduction</b>          |         |                                                                                                                                                                                                                                                                                                                                                                                                                            |
| Background/rationale         | 2       | Explain the scientific background and rationale for the investigation being reported ( <b>Page 3</b> )                                                                                                                                                                                                                                                                                                                     |
| Objectives                   | 3       | State specific objectives, including any prespecified hypotheses ( <b>Page 4</b> )                                                                                                                                                                                                                                                                                                                                         |
| <b>Methods</b>               |         |                                                                                                                                                                                                                                                                                                                                                                                                                            |
| Study design                 | 4       | Present key elements of study design early in the paper ( <b>Page 5</b> )                                                                                                                                                                                                                                                                                                                                                  |
| Setting                      | 5       | Describe the setting, locations, and relevant dates, including periods of recruitment, exposure, follow-up, and data collection ( <b>Page 5</b> )                                                                                                                                                                                                                                                                          |
| Participants                 | 6       | (a) Give the eligibility criteria, and the sources and methods of selection of participants ( <b>N/A</b> )                                                                                                                                                                                                                                                                                                                 |
| Variables                    | 7       | Clearly define all outcomes, exposures, predictors, potential confounders, and effect modifiers. Give diagnostic criteria, if applicable ( <b>Page 5</b> )                                                                                                                                                                                                                                                                 |
| Data sources/<br>measurement | 8*      | For each variable of interest, give sources of data and details of methods of assessment (measurement). Describe comparability of assessment methods if there is more than one group ( <b>N/A</b> )                                                                                                                                                                                                                        |
| Bias                         | 9       | Describe any efforts to address potential sources of bias ( <b>N/A</b> )                                                                                                                                                                                                                                                                                                                                                   |
| Study size                   | 10      | Explain how the study size was arrived at ( <b>Page 5</b> )                                                                                                                                                                                                                                                                                                                                                                |
| Quantitative variables       | 11      | Explain how quantitative variables were handled in the analyses. If applicable, describe which groupings were chosen and why ( <b>Page 5</b> )                                                                                                                                                                                                                                                                             |
| Statistical methods          | 12      | (a) Describe all statistical methods, including those used to control for confounding ( <b>Page 5</b> )<br>(b) Describe any methods used to examine subgroups and interactions ( <b>Page 5</b> )<br>(c) Explain how missing data were addressed ( <b>NA</b> )<br>(d) If applicable, describe analytical methods taking account of sampling strategy ( <b>N/A</b> )<br>(e) Describe any sensitivity analyses ( <b>N/A</b> ) |
| <b>Results</b>               |         |                                                                                                                                                                                                                                                                                                                                                                                                                            |
| Participants                 | 13*     | (a) Report numbers of individuals at each stage of study—eg numbers potentially eligible, examined for eligibility, confirmed eligible, included in the study, completing follow-up, and analysed ( <b>N/A</b> )<br>(b) Give reasons for non-participation at each stage ( <b>N/A</b> )<br>(c) Consider use of a flow diagram ( <b>N/A</b> )                                                                               |
| Descriptive data             | 14*     | (a) Give characteristics of study participants (eg demographic, clinical, social) and information on exposures and potential confounders ( <b>Page 6</b> )<br>(b) Indicate number of participants with missing data for each variable of interest ( <b>N/A</b> )                                                                                                                                                           |
| Outcome data                 | 15*     | Report numbers of outcome events or summary measures ( <b>Page 6</b> )                                                                                                                                                                                                                                                                                                                                                     |
| Main results                 | 16      | (a) Give unadjusted estimates and, if applicable, confounder-adjusted estimates and their precision (eg, 95% confidence interval). Make clear which confounders were adjusted for and why they were included ( <b>Page 6</b> )                                                                                                                                                                                             |



1  
2  
3  
4  
5  
6  
7  
8  
9  
10  
11  
12  
13  
14  
15  
16  
17  
18  
19  
20  
21  
22  
23  
24  
25  
26  
27  
28  
29  
30  
31  
32  
33  
34  
35  
36  
37  
38  
39  
40  
41  
42  
43  
44  
45  
46  
47  
48  
49  
50  
51  
52  
53  
54  
55  
56  
57  
58  
59  
60

(b) Report category boundaries when continuous variables were categorized (**Page 6**)

(c) If relevant, consider translating estimates of relative risk into absolute risk for a meaningful time period (**N/A**)

|                |    |                                                                                                                  |
|----------------|----|------------------------------------------------------------------------------------------------------------------|
| Other analyses | 17 | Report other analyses done—eg analyses of subgroups and interactions, and sensitivity analyses ( <b>Page 6</b> ) |
|----------------|----|------------------------------------------------------------------------------------------------------------------|

### Discussion

|             |    |                                                                            |
|-------------|----|----------------------------------------------------------------------------|
| Key results | 18 | Summarise key results with reference to study objectives ( <b>Page 7</b> ) |
|-------------|----|----------------------------------------------------------------------------|

|             |    |                                                                                                                                                                              |
|-------------|----|------------------------------------------------------------------------------------------------------------------------------------------------------------------------------|
| Limitations | 19 | Discuss limitations of the study, taking into account sources of potential bias or imprecision. Discuss both direction and magnitude of any potential bias ( <b>Page 7</b> ) |
|-------------|----|------------------------------------------------------------------------------------------------------------------------------------------------------------------------------|

|                |    |                                                                                                                                                                                              |
|----------------|----|----------------------------------------------------------------------------------------------------------------------------------------------------------------------------------------------|
| Interpretation | 20 | Give a cautious overall interpretation of results considering objectives, limitations, multiplicity of analyses, results from similar studies, and other relevant evidence ( <b>Page 7</b> ) |
|----------------|----|----------------------------------------------------------------------------------------------------------------------------------------------------------------------------------------------|

|                  |    |                                                                                         |
|------------------|----|-----------------------------------------------------------------------------------------|
| Generalisability | 21 | Discuss the generalisability (external validity) of the study results ( <b>Page 8</b> ) |
|------------------|----|-----------------------------------------------------------------------------------------|

### Other information

|         |    |                                                                                                                                                                                 |
|---------|----|---------------------------------------------------------------------------------------------------------------------------------------------------------------------------------|
| Funding | 22 | Give the source of funding and the role of the funders for the present study and, if applicable, for the original study on which the present article is based ( <b>Page 8</b> ) |
|---------|----|---------------------------------------------------------------------------------------------------------------------------------------------------------------------------------|

\*Give information separately for exposed and unexposed groups.

**Note:** An Explanation and Elaboration article discusses each checklist item and gives methodological background and published examples of transparent reporting. The STROBE checklist is best used in conjunction with this article (freely available on the Web sites of PLoS Medicine at <http://www.plosmedicine.org/>, Annals of Internal Medicine at <http://www.annals.org/>, and Epidemiology at <http://www.epidem.com/>). Information on the STROBE Initiative is available at [www.strobe-statement.org](http://www.strobe-statement.org).
