# Supplementary material for: Is enrolment in the national health insurance scheme in Ghana pro-poor? Evidence from the Ghana Living Standards Survey
Source: PubMed Central journal article supplement — BMJ Open. 2019 Jul 1;9(7):e029419. doi: 10.1136/bmjopen-2019-029419 (PMC6609063; doi:10.1136/bmjopen-2019-029419), 2019-07-01
Supplement: bmjopen-2019-029419supp001.pdf [file bmjopen-2019-029419supp001.pdf]

**Appendix 1: Distribution of population by region, sex and locality of enumeration, 2010**

| Region             | Total Population  | Male              | Female            | Locality of enumeration |                   | Share of Population (%) | Proportion urban | Sex Ratio   | Percentage increase over 2000 | Intercensal Growth Rate (%) |
|--------------------|-------------------|-------------------|-------------------|-------------------------|-------------------|-------------------------|------------------|-------------|-------------------------------|-----------------------------|
|                    |                   |                   |                   | Urban                   | Rural             |                         |                  |             |                               |                             |
| <b>All Regions</b> | <b>24,658,823</b> | <b>12,024,845</b> | <b>12,633,978</b> | <b>12,545,229</b>       | <b>12,113,594</b> | <b>100.0</b>            | <b>50.9</b>      | <b>95.2</b> | <b>30.4</b>                   | <b>2.5</b>                  |
| Western            | 2,376,021         | 1,187,774         | 1,188,247         | 1,007,969               | 1,368,052         | 9.6                     | 42.4             | 100.0       | 23.5                          | 2.0                         |
| Central            | 2,201,863         | 1,050,112         | 1,151,751         | 1,037,878               | 1,163,985         | 8.9                     | 47.1             | 91.2        | 38.1                          | 3.1                         |
| Greater Accra      | 4,010,054         | 1,938,225         | 2,071,829         | 3,630,955               | 379,099           | 16.3                    | 90.5             | 93.6        | 38.0                          | 3.1                         |
| Volta              | 2,118,252         | 1,019,398         | 1,098,854         | 713,735                 | 1,404,517         | 8.6                     | 33.7             | 92.8        | 29.5                          | 2.5                         |
| Eastern            | 2,633,154         | 1,290,539         | 1,342,615         | 1,143,918               | 1,489,236         | 10.7                    | 43.4             | 96.1        | 25.0                          | 2.1                         |
| Ashanti            | 4,780,380         | 2,316,052         | 2,464,328         | 2,897,290               | 1,883,090         | 19.4                    | 60.6             | 94.0        | 32.3                          | 2.7                         |
| Brong Ahafo        | 2,310,983         | 1,145,271         | 1,165,712         | 1,028,473               | 1,282,510         | 9.4                     | 44.5             | 98.2        | 27.3                          | 2.3                         |
| Northern           | 2,479,461         | 1,229,887         | 1,249,574         | 750,712                 | 1,728,749         | 10.1                    | 30.3             | 98.4        | 36.2                          | 2.9                         |
| Upper East         | 1,046,545         | 506,405           | 540,140           | 219,646                 | 826,899           | 4.2                     | 21.0             | 93.8        | 13.7                          | 1.2                         |
| Upper West         | 702,110           | 341,182           | 360,928           | 114,653                 | 587,457           | 2.8                     | 16.3             | 94.5        | 21.8                          | 1.9                         |

**Source:** Adapted from Ghana Statistical Service <sup>18</sup>
