# Supplementary material for: Is enrolment in the national health insurance scheme in Ghana pro-poor? Evidence from the Ghana Living Standards Survey
Source: PubMed Central journal article supplement — BMJ Open. 2019 Jul 1;9(7):e029419. doi: 10.1136/bmjopen-2019-029419 (PMC6609063; doi:10.1136/bmjopen-2019-029419), 2019-07-01
Supplement: bmjopen-2019-029419supp002.pdf [file bmjopen-2019-029419supp002.pdf]

**Appendix 2:** Poverty incidence and poverty gap by region (%) 2005/06–2012/13 (Poverty line=GHS1,314=US\$277.22)

| Region         | Poverty incidence (P <sub>0</sub> ) | Contribution to total poverty (C <sub>0</sub> ) | Poverty gap (P <sub>1</sub> ) | Contribution to total poverty gap (C <sub>1</sub> ) | Poverty incidence (P <sub>0</sub> ) | Contribution to total poverty (C <sub>0</sub> ) | Poverty gap (P <sub>1</sub> ) | Contribution to total poverty gap |
|----------------|-------------------------------------|-------------------------------------------------|-------------------------------|-----------------------------------------------------|-------------------------------------|-------------------------------------------------|-------------------------------|-----------------------------------|
| <b>2012/13</b> |                                     |                                                 |                               |                                                     | <b>2005/06</b>                      |                                                 |                               |                                   |
| Western        | 20.9                                | 7.9                                             | 5.7                           | 6.8                                                 | 22.9                                | 7.3                                             | 5.4                           | 5.0                               |
| Central        | 18.8                                | 6.9                                             | 5.6                           | 6.4                                                 | 23.4                                | 6.4                                             | 5.6                           | 4.4                               |
| Greater Accra  | 5.6                                 | 3.8                                             | 1.6                           | 3.5                                                 | 13.5                                | 5.9                                             | 3.7                           | 4.7                               |
| Volta          | 33.8                                | 12.1                                            | 9.8                           | 11.0                                                | 37.3                                | 8.7                                             | 9.2                           | 6.2                               |
| Eastern        | 21.7                                | 9.3                                             | 5.8                           | 7.8                                                 | 17.8                                | 7.5                                             | 4.2                           | 5.2                               |
| Ashanti        | 14.8                                | 12.0                                            | 3.5                           | 9.0                                                 | 24.0                                | 12.6                                            | 6.4                           | 9.8                               |
| Brong Ahafo    | 27.9                                | 11.4                                            | 7.4                           | 9.4                                                 | 34.0                                | 9.8                                             | 9.5                           | 7.9                               |
| Northern       | 50.4                                | 20.8                                            | 19.3                          | 24.9                                                | 55.7                                | 21.0                                            | 23.0                          | 25.2                              |
| Upper East     | 44.4                                | 7.4                                             | 17.2                          | 9.0                                                 | 72.9                                | 10.9                                            | 35.3                          | 15.3                              |
| Upper West     | 70.7                                | 8.4                                             | 33.2                          | 12.3                                                | 89.1                                | 10.0                                            | 50.7                          | 16.4                              |
| All Ghana      | 24.2                                | 100.0                                           | 7.8                           | 100.0                                               | 31.9                                | 100.0                                           | 11.0                          | 100.0                             |

Source: Adapted from Ghana Statistical Service <sup>19</sup>
